# Supplementary material for: An entropic safety catch controls hepatitis C virus entry and antibody resistance
Source: eLife journal article supplement (doi:10.7554/elife.71854), 2022-07-07
Supplement: supp [file elife-71854-supp-v1.zip]

Archive with 15 entries (15 files):
- elife_poa_e71854_Transparent_Reporting_File.pdf
- elife_poa_e71854_Figure_1_figure_supplement_1.jpg
- elife_poa_e71854_Figure_1_figure_supplement_2.jpg
- elife_poa_e71854_Figure_2_figure_supplement_1.jpg
- elife_poa_e71854_Figure_3_figure_supplement_1.jpg
- elife_poa_e71854_Figure_3_figure_supplement_2.jpg
- elife_poa_e71854_Figure_3_figure_supplement_3.jpg
- elife_poa_e71854_Figure_4_figure_supplement_1.jpg
- elife_poa_e71854_Figure_4_figure_supplement_2.jpg
- elife_poa_e71854_Figure_4_figure_supplement_3.jpg
- elife_poa_e71854_Figure_4_figure_supplement_4.jpg
- elife_poa_e71854_Figure_4_figure_supplement_5.jpg
- elife_poa_e71854_Figure_6_figure_supplement_1.jpg
- elife_poa_e71854_Source_data_1.xlsx
- elife_poa_e71854_Figure_4_figure_supplement_1_source_data_1.zip
