# Supplementary material for: An entropic safety catch controls hepatitis C virus entry and antibody resistance
Source: eLife journal article supplement (doi:10.7554/elife.71854), 2022-07-07
Supplement: supp [file elife-71854-supp-v1.zip › elife_poa_e71854_Source_data_1.xlsx]

## Sheet: Figure 1
Figure 1 A	Infectious Titres - one representative experiment (n=9 technical repeats), values normalised for input particle number
	WT	I438V	I438V A524T
	12798.1	24871.8	37134.3
	10575.4	24019.8	36120.5
	9644.7	27400.4	45293.2
	9951.84	21786.3	42996.1
	19141.4	23904.4	43535.3
	12889.8	29000.9	45313.8
	15913	32549.5	46792.4
	14738.1	26431.7	54325.4
	10800.6	31850.2	42449.4
Figure 1 B	Infection of Receptor KO cells - values normalised (fraction) to parental Huh-7 cells, n= 4 biological repeats.
	WT				I438V				I438V A524T
Huh-7 Parent	1	1	1	1	1	1	1	1	1	1	1	1
CD81	0	0	0	0	0	0	0	0.0310753	0	0	0	0
SR-B1	0.0953174	0.0999547	0.139014	0.176265	0.167217	0.26089	0.411165	0.494689	0.199323	0.432471	0.840101	0.734384
CLDN1	0.0228386	0.0260389	0.011784	0.043923	0	0	0	0	0	0	0	0
OCLN	0	0	0.025408	0.11136	0.0163774	0.016744	0.0105372	0	0.029266	0.0246491	0.0295117	0.0160117
Figure 1 C	Anti-SR-B1 Titration - values normalised (percentage) to untreated cells, n=4 biological repeats.
Reciprocal Dilution	WT				I438V A524T
0.0025	87.14	70.1663	72.4862	57.6243	50.35	14.3164	10.6277	24.6924
0.00125	80.48	63.303	67.2058	58.049	-26.58	26.62	38.1995	27.7107
0.000625	71.67	61.4727	58.4811	58.2628	14.86	38.5289	37.7367	30.8433
0.0003125	65.61	42.0999	60.293	39.312	24.62	43.538	42.1569	30.9179
0.00015625	84.92	54.2156	52.4751	24.0866	-26.81		39.1828	14.5499
7.8125e-05	35.91	40.514	25.785	18.6032	-34.54	29.7682	30.9793	17.739
3.90625e-05		28.6348	18.8683	18.6678		10.1273	15.5038	25.8264
0	0	0	0	0	0	0	0	0
Figure 1 C	Anti-CD81 Titration - values normalised (percentage) to untreated cells, n=3 biological repeats.
Concentration (µg/ml)	WT				I438V A524T
0.5	100	98.792	98.5139		100	100	98.0604
0.166667	99.68	99.6174	98.7724		99.18	99.6337	98.9698
0.0555556	98.68	99.2569	98.1754		98.62	96.1886	98.544
0.0185185	96.71	97.6295	94.9318		92.19	93.9788	86.975
0.00617284	76.63	79.9729	71.9851		70.51	72.5673	58.2379
0.00205761	62.17	55.1285	11.7143		50.22	57.2968	36.8658
0.000685871	21.15	32.0474	11.3283		26.96	30.3738	24.8312
0	0	0	0		0	0	0
Figure 1 D	SR-B1 Over-expression - one representative experiment (n=9 technical repeats) values normalised (fraction) to untreated
	WT				I438V A524T
	Lentivector reciprocal dilution				Lentivector reciprocal dilution
	Untreated	0.1	0.2	0.5	Untreated	0.1	0.2	0.5
	1.41679	2.33672	2.64766	3.10578	1.41679	2.33672	2.64766	3.10578
	1.03209	3.20543	3.17971	3.04398	1.03209	3.20543	3.17971	3.04398
	0.99337	2.79071	2.13665	3.46119	0.99337	2.79071	2.13665	3.46119
	1.08962	3.1428	3.20144	3.07635	1.08962	3.1428	3.20144	3.07635
	0.750178	3.19954	2.53492	2.46336	0.750178	3.19954	2.53492	2.46336
	0.8596	3.0244	2.71983	3.87621	0.8596	3.0244	2.71983	3.87621
	1.03833	2.97826	2.52825	2.68847	1.03833	2.97826	2.52825	2.68847
	1.01448	3.99661	2.25323	2.7862	1.01448	3.99661	2.25323	2.7862
	0.80554	3.07806	2.14261	2.62651	0.80554	3.07806	2.14261	2.62651
Figure 1 D	CD81 Over-expression - one representative experiment (n=9 technical repeats) values normalised (fraction) to untreated
	WT				I438V A524T
	Lentivector reciprocal dilution				Lentivector reciprocal dilution
	Untreated	0.1	0.2	0.5	Untreated	0.1	0.2	0.5
	1.1599	2.16377	2.22634	3.34359	0.998454	1.52942	1.79758	2.01427
	0.9562	1.56217	2.53742	3.32858	1.12899	1.15923	1.84963	2.2475
	0.874027	1.85354	2.86826	3.52024	0.83526	1.28333	1.27354	2.508
	1.25854	2.21081	2.28301	2.84148	0.833127	1.6168	1.68781	2.21596
	0.69652	2.2534	2.42122	2.69814	0.94947	1.42639	2.09082	2.78613
	1.01658	1.85354	2.24108	2.74355	0.695016	1.35516	2.09638	2.82636
	1.23746	1.8046	2.11548	4.35326	1.22996	1.97853	1.58444	2.75055
	0.827698	1.96833	2.09204	2.86258	1.09003	1.40529	2.03775	2.35605
	0.97308	2.45348	1.99402	4.43511	1.2397	1.78804	2.15737	2.33024
Figure 1 F	sE2-SR-B1 binding - values normalised to signal at WT 40µg/ml (fraction), n= 3 biological repeats
[sE2] μg/ml	WT			I438V A524T
1.25	0.29	0.18	0.19	0.13	0.09	0.08
2.5	0.41	0.38	0.27	0.2	0.16	0.13
5	0.55	0.55	0.39	0.28	0.25	0.18
10	0.58	0.69	0.58	0.33	0.31	0.24
20	0.8	0.85	0.76	0.43	0.38	0.31
40	1	1	1	0.52	0.47	0.41
Figure 1 S2	BLT-4 Inhibition - normalised to untreated control (percentage inhibition), n=3 biological repeats
[IgG] µg/ml	WT			I438V A524T
16.6667	66.027	75.8737	54.9543	24.9761	44.3608	8.22058
5.05051	57.6334	66.3113	72.5907	29.3995	42.1711	15.2945
1.6835	40.4507	73.4563	65.6008	17.2907	34.5572	30.8978
0.510152	29.2892	44.5121	47.7759	0.818198	28.3804	13.8977
0.170051	26.4129	34.5886	42.1094	8.03476	31.9663	-16.8188
0.0515305	15.5568	23.1841	32.8449	5.14868	12.8136	-8.29936

## Sheet: Figure 2
Figure 2 A	Particle stability - values normalised to 0H (fraction), n=2 biological repeats
Time (H)	WT		I438V A524T
0	1	1	1	1
2	0.7273	0.7939	0.5887	0.4653
4	0.5598	0.7548	0.4669	0.3206
6	0.474	0.7144	0.3281	0.2472
8	0.3862	0.5019	0.2235	0.1825
Figure 2 D	Entry kinetics - values normalised (fraction) to control, n=3 biological repeats
Time (H)	WT			I438V A524T
-0.5	0.0082	0.0444	-0.0177	-0.0083	0.087	-0.0191
-0.25	0.0007	0.0242	-0.0459	0.011	0.0751	0.0045
0	0.0118	0.1186	-0.0289	0.0911	0.1182	0.06
0.25	0.0245	0.0732	-0.0389	0.1614	0.1387	0.1119
0.5	0.0746	0.0289	-0.0096	0.289	0.35	0.2482
0.75	0.0667	0.0901	0.0044	0.4832	0.3916	0.438
1	0.1176	0.157	-0.0239	0.6674	0.633	0.3171
2	0.2944	0.1817	0.2284	0.7961	0.6107	0.688
3	0.4928	0.3698	0.2946	0.9911	0.578	0.7757
4	0.5774	0.6603	0.4328	0.9921	0.8441	0.7895
5	0.702	0.6166	0.474	0.8884	0.9336	0.7881

## Sheet: Figure 3
Figure 3 A	HCV+ Patient IgG Neutralisation - normalised to untreated control (percentage neutralisation), n=3 biological repeats
[IgG] µg/ml	WT			I438V A524T
100	71.0637	78.6917	70.3489	98.4484	100.161	100.593
30	74.4313	65.1048	58.8588	97.6971	101.033	98.7729
10	56.6826	56.3226	59.6328	99.1188	101.597	99.6132
3	57.8509	54.0513	38.6168	97.3091	92.6738	93.1935
1	63.7775	20.7516	50.0136	95.8476	94.0251	95.0616
0.3	39.8838	40.2624	47.1972	91.0258	81.1761	84.8548
0.1	43.3242	10.0066	24.6633	68.1467	53.7812	66.1261
0.03	28.9098	4.22457	15.0365	44.9988	38.1607	55.8342
0.01	30.2486	10.4024	18.4833	23.4605	21.9825	41.0623
Figure 3 C	J6.36 Neutralisation - normalised to untreated control (percentage neutralisation), n=3 biological repeats
[mAb] µg/ml	WT			I438V A524T
10	62.66	83.39	54.41	100	100	100
3	46.84	78.47	65.34	100	94.61	100
1	3.07	64.19	51.48	97.46	96.54	95.34
0.3	15.79	52.57	18.29	72.63	86.08	93.87
0.1	3.41	56.65	42.83	38.85	57.22	68.57
0.03	7.79	34.28	16.4	33.07	30.55	42.86
0.01	6.35	25.43	19.98	18.82	3.96	40.11
0.003	-6.64	9.21	-19.4	30.58	3.53	33.35
0.001	-7.39	21.25	2.85	21.36	13.28	15
0.0003	6.68	4.58	13.41	17.52	7.69	20.77
Figure 3 C	H77.39 Neutralisation - normalised to untreated control (percentage neutralisation), n=3 biological repeats
[mAb] µg/ml	WT			I438V A524T
10	54.81	62.66	67.65	100	100	100
3	37.56	46.84	62.39	91.29	100	95.52
1	37.21	3.07	44.66	86.7	97.46	91.41
0.3	-0.02	15.79	28.35	68.84	72.63	61.46
0.1	-5.29	3.41	17.15	40.38	38.85	29.93
0.03	-6.03	7.79	8.65	22.88	33.07	22.5
0.01	0.2	6.35	21.02	10.94	18.82	10.3
0.003	-6.21	-6.64	12.45	13.02	30.58	9.02
0.001	16.14	-7.39	11.33	44.11	21.36	5.6
0.0003	10.33	6.68	12.8	5.97	17.52	17.1
Figure 3 C	AR3A Neutralisation - normalised to untreated control (percentage neutralisation), n=2 biological repeats
[mAb] µg/ml	WT			I438V A524T
10	69.3076	49.7764		100.033	95.2351
3	54.3741	52.4282		99.6868	97.1925
1	44.2317	42.6978		99.4374	98.219
0.3	50.4058	51.2238		98.2669	97.1484
0.1	31.7416	52.8931		99.0815	95.0821
0.03	31.1104	40.8172		90.189	97.9655
0.01	39.5683	32.5448		84.1851	88.0442
0.003	5.75424	25.4345		60.521	64.7701
Figure 3 D	mAb IC50 values (µg/ml)
Antibody	WT	I438V A524T
Patient IgG	2.7	0.04
J6.36	1.89	0.06
H77.39	3.44	0.13
HC33.1.53	10	0.19
AR3A	0.01	0.0006
AR3C	1.14	0.003
HC84.26	0.25	0.003
HepC3	10	1.4
HepC43	0.23	0.05
sCD81	16.2	0.83
AR2A	10	0.57
AR4A	0.71	0.01
AR5A	10	0.01
CBH-7	10	0.2
Figure 3 E	mAb-sE2 binding ELISA - representative raw data
	J6.36			H77.39			AR3A
[mAb] µg/ml	WT	I438V A524T		WT	I438V A524T		WT	I438V A524T
10	0.813	0.650592		0.813	0.650592		1.304	1.66194
5	0.805	0.763135		0.805	0.763135		1.67	1.49544
2.5	0.647	0.653675		0.647	0.653675		0.906	0.803219
1.25	0.568	0.391588		0.568	0.391588		0.751	0.533424
0.63	0.398	0.260545		0.398	0.260545		0.577	0.280587
0.31	0.221	0.15571		0.221	0.15571		0.292	0.163419
0.16	0.189	0.121793		0.189	0.121793		0.217	0.140293
0.08	0.151	0.0894178		0.151	0.0894178		0.197	0.0894178
0.04	0.072	0.0817094		0.072	0.0817094		0.07	0.222003
Figure 3 F	mAb Kd values (µg/ml)
Antibody	WT	I438V A524T
J6.36	0.359667	0.511733
H77.39	0.822475	1.06978
HC33.1.53	2.21967	4.43367
AR3A	0.7256	1.02748
AR3C	0.385433	0.315933
HC1	0.867333	1.41273
CBH-4B	0.30356	0.499237
CBH-7	0.0388815	0.0436325
CBH-23	0.1294	0.75675
Figure 3 S2A	Infection of Receptor KO cells (HCVpp) - values normalised (fraction) to parental Huh-7 cells, n= 4 biological repeats.
	WT				I438V A524T
Huh-7 Parent	0.872657	1.09111	0.98924	1.04699	1.19776	1.08546	0.958609	0.758165
CD81	0.023924	0.00856764	0.0064866	0.0089622	0.0298943	0.0789799	0.018759	0.032541
SR-B1	0.0733412	0.0843935	0.077226	0.0801367	0.253801	0.235084	0.227471	0.275375
Figure 3 S2B	Particle stability (HCVpp) - values normalised to 0H (fraction), n=3 biological repeats
Time (H)	J6 WT			I438V A524T
0	1	1	1	1	1	1
2	0.920169	1.03505	0.906363	0.672964	0.697209	0.661355
4	0.925419	0.718521	0.602567	0.638704	0.359835	0.381959
6	0.693571	0.484323	0.311748	0.489995	0.271863	0.288584
8	0.500687	0.371256	0.209616	0.367231	0.222154	0.216098
Figure 3 S2C	HCV+ Patient IgG Neutralisation (HCVpp) - normalised to untreated control (percentage neutralisation), n=3 biological repeats
[IgG] µg/ml	WT			I438V A524T
100	64.04	42.25	59.77	97	93.16	97.07
30	34.65	24.26	42.32	93.4	88.77	95.16
10	26.41	17.84	28.7	88.87	81.52	92.19
3	11.67	4.56	21.48	79.8	72.22	89.87
1	4	2.26	18.3	71.9	62.66	83.31
0.3	-2.13	-15.73	11.1	52.41	42.51	67.82
0.1	-1.46	-2.44	17.7	46.9	29.72	62.74
0.03	-13.66	-17.44	18.36	12.87	6.46	37.27
Figure 3 S3A	Raw pseudovirus luciferase signals from pH treatment experiment, n = >4 technical repeats
	WT			I438V A524T			CHIKV
No glycoprotein pH7	pH7	pH 6	pH 5	pH7	pH 6	pH 5	pH7	pH 6	pH 5
920	22100	36100	46000	96000	86500	162000	8150000	3840000	0.00243238
2430	38800	29400	52200	123000	94100	172000	9670000	3550000	0.00228464
820	33600	44300	54800	96700	96200	112000	9190000	4600000	0.00172532
2090	28700	45800	45400	87500	108000	96300	10900000	3750000	0.00150371
2460
250
1890
1680
2320
Figure 3 S3B	pH treatment experiment, normalised to each respective pH 7 treated pseudovirus n = 3 biological repeats
	WT			I438V A524T			CHIKV
	pH7	pH 6	pH 5	pH7	pH 6	pH 5	pH7	pH 6	pH 5
	1	1.275	1.643	1	0.9525	1.35	1	0.4175	0.001987
	1	0.86	1.393	1	0.61	1.125	1	0.4775	-0.0003521
	1	1.418	1.44	1	1.053	1.025	1	0.33	0.001382
Figure 3 S3B	pH treatment experiment +/- sCD81, normalised to each respective pH 7 without sCD81 pseudovirus n = 3 biological repeats
	WT			WT + sCD81			I438V A524T			I438V A524T + sCD81
	pH7	pH 6	pH 5	pH7	pH 6	pH 5	pH7	pH 6	pH 5	pH7	pH 6	pH 5
	1	1.38938	1.4118	0.842541	1.10782	1.09554	1	1.05356	1.02279	0.891738	0.623932	0.652991
	1	0.908495	0.933779	1.37258	1.19866	0.853913	1	0.940244	0.972371	0.981366	0.644463	0.502891
	1	0.979306	0.86549	0.495435	0.548996	0.631163	1	1.18877	1.25283	0.979465	0.654861	0.768086

## Sheet: Figure 4
Figure 4 C	MD simulations - average RMSF, n=5 independent simulations
	WT			I438V A524T
Residue	RMSF (Å)	SEM	N	RMSF (Å)	SEM	N
384	14.9506	3.14277	5	6.02398	1.11948	5
385	13.559	3.07623	5	5.21946	1.05945	5
386	12.1808	3.05182	5	4.65072	1.10631	5
387	11.0036	3.09454	5	4.03964	1.12448	5
388	10.3267	3.04427	5	3.9904	1.13782	5
389	10.0492	2.95275	5	4.37622	1.22484	5
390	10.1512	2.80526	5	4.91754	1.37072	5
391	10.1049	2.6721	5	5.47038	1.41576	5
392	9.38428	2.73509	5	6.32406	1.26844	5
393	8.98948	2.59374	5	6.55964	1.19073	5
394	8.70036	2.41327	5	6.76992	1.09613	5
395	8.68826	2.29887	5	6.27366	1.01773	5
396	8.6224	2.1088	5	5.76552	1.00349	5
397	8.43544	1.945	5	5.631	1.02843	5
398	7.89356	1.82775	5	5.61306	0.937958	5
399	7.46098	1.68142	5	5.42582	1.06354	5
400	7.00774	1.33835	5	5.18256	1.0631	5
401	6.69734	1.01547	5	4.51906	0.917802	5
402	6.53602	0.951804	5	3.8059	0.694306	5
403	6.82582	0.574389	5	3.42752	0.56354	5
404	6.84672	0.467515	5	3.4911	0.529967	5
405	6.08254	0.641383	5	3.84048	0.58243	5
406	5.85686	0.734444	5	4.20108	0.680894	5
407	5.83964	0.742651	5	4.34476	0.822091	5
408	5.03202	0.614387	5	3.9856	0.876001	5
409	4.00166	0.51684	5	3.31578	0.724048	5
410	3.05534	0.563526	5	3.04414	0.574238	5
411	2.789	0.568488	5	2.80654	0.459578	5
412	2.4215	0.566519	5	2.00332	0.221719	5
413	2.3654	0.511972	5	1.67744	0.144507	5
414	2.38882	0.541383	5	1.7746	0.23211	5
415	2.9409	0.668265	5	2.24606	0.248021	5
416	3.19776	0.63125	5	2.52036	0.219456	5
417	3.35394	0.229121	5	3.25134	0.282035	5
418	3.15524	0.203298	5	3.27544	0.21997	5
419	2.71158	0.26994	5	2.53516	0.152818	5
420	2.18852	0.23159	5	1.9008	0.0734872	5
421	1.68806	0.181196	5	1.48226	0.104886	5
422	1.30442	0.129955	5	1.21742	0.113645	5
423	1.11004	0.0375766	5	1.07796	0.112704	5
424	0.9835	0.0996741	5	0.97686	0.130293	5
425	0.78686	0.0990915	5	0.84058	0.067579	5
426	0.6415	0.0656405	5	0.66476	0.0537323	5
427	0.73756	0.0695356	5	0.77176	0.0421543	5
428	0.73358	0.0905306	5	0.82334	0.0366667	5
429	0.86456	0.0866362	5	0.94816	0.0563192	5
430	1.33672	0.111753	5	1.35554	0.126162	5
431	2.02408	0.235826	5	1.70858	0.205667	5
432	2.25338	0.272469	5	2.08584	0.432275	5
433	2.80662	0.228962	5	2.6809	0.494093	5
434	2.83404	0.286938	5	3.01702	0.338176	5
435	2.63008	0.232504	5	2.85526	0.386404	5
436	2.44196	0.145114	5	2.60264	0.312012	5
437	2.06346	0.181464	5	2.08068	0.310754	5
438	1.78862	0.149114	5	1.85364	0.286786	5
439	1.98988	0.167784	5	2.01808	0.369158	5
440	1.88146	0.282718	5	1.81558	0.418556	5
441	1.65016	0.258864	5	1.7921	0.400068	5
442	1.82634	0.216615	5	2.0764	0.398842	5
443	2.14932	0.227682	5	2.25306	0.456193	5
444	2.67966	0.236299	5	2.8667	0.488843	5
445	3.21738	0.368636	5	3.292	0.549385	5
446	3.55354	0.443879	5	3.60568	0.589285	5
447	3.6028	0.327466	5	3.55276	0.614424	5
448	3.37676	0.298706	5	3.43534	0.619856	5
449	3.13584	0.321563	5	3.2016	0.562544	5
450	3.0888	0.38268	5	2.673	0.309608	5
451	2.62444	0.243392	5	2.06302	0.168762	5
452	2.24838	0.164356	5	1.75922	0.107851	5
453	2.57766	0.203939	5	2.14478	0.264364	5
454	2.96594	0.297727	5	2.75466	0.457147	5
455	2.71956	0.134851	5	2.93822	0.610415	5
456	2.0364	0.310364	5	2.45822	0.493215	5
457	2.13536	0.768932	5	2.39008	0.593914	5
458	1.9499	0.841415	5	2.33578	0.71841	5
459	1.77984	0.63918	5	2.00052	0.481354	5
460	2.19994	0.855701	5	2.37594	0.404203	5
461	2.59654	0.930744	5	3.02786	0.471961	5
462	2.89316	1.09017	5	3.46824	0.515977	5
463	2.63124	0.968719	5	3.20212	0.413927	5
464	2.45982	0.74381	5	3.19118	0.424689	5
465	2.92266	0.831445	5	3.5958	0.611613	5
466	3.0773	0.93228	5	3.75202	0.725256	5
467	2.94302	0.73432	5	3.78668	0.831078	5
468	3.0291	0.596529	5	4.20626	1.06494	5
469	2.88128	0.413017	5	4.20078	1.16163	5
470	3.30788	0.354313	5	5.01868	1.17987	5
471	3.8581	0.341353	5	5.9966	1.178	5
472	4.53592	0.365225	5	6.2005	1.1164	5
473	5.09264	0.428207	5	6.22396	1.33093	5
474	5.63236	0.673805	5	6.26964	1.78347	5
475	6.75452	0.994198	5	6.60718	1.94545	5
476	7.44964	1.16484	5	6.95754	2.00059	5
477	8.0746	1.37123	5	6.93398	1.83825	5
478	7.70954	1.35081	5	6.25722	1.61371	5
479	6.869	1.16336	5	5.7188	1.42768	5
480	6.01722	1.13783	5	5.20286	1.14665	5
481	5.37924	1.02968	5	5.10404	1.12756	5
482	4.94772	0.963366	5	4.81022	1.06119	5
483	4.65082	0.862163	5	4.80578	1.02322	5
484	3.63594	0.757869	5	4.05194	0.880501	5
485	2.6256	0.598287	5	3.12492	0.722261	5
486	2.00566	0.391038	5	2.4026	0.515594	5
487	1.6898	0.255567	5	2.10752	0.463655	5
488	1.32042	0.192749	5	1.68652	0.365553	5
489	1.18062	0.116773	5	1.44434	0.28	5
490	1.11066	0.122867	5	1.30526	0.249905	5
491	1.0284	0.104738	5	1.29996	0.304949	5
492	1.1632	0.132681	5	1.33464	0.318019	5
493	1.31876	0.178375	5	1.28434	0.284265	5
494	1.37538	0.221065	5	1.30814	0.249666	5
495	1.30224	0.266397	5	1.4927	0.200024	5
496	1.02206	0.163177	5	1.3349	0.189286	5
497	0.96532	0.157085	5	1.23974	0.216293	5
498	0.85774	0.105412	5	0.96348	0.11257	5
499	0.6342	0.0552441	5	0.69482	0.0459681	5
500	0.59912	0.0489923	5	0.67398	0.0636717	5
501	0.56848	0.042577	5	0.64776	0.0660075	5
502	0.60704	0.0349482	5	0.69184	0.0637702	5
503	0.54306	0.0314616	5	0.6497	0.0519518	5
504	0.4549	0.0246823	5	0.5225	0.0389823	5
505	0.50088	0.0322222	5	0.54458	0.0276324	5
506	0.55018	0.0368182	5	0.59174	0.0459869	5
507	0.56574	0.0336038	5	0.57918	0.0333987	5
508	0.48232	0.0302598	5	0.49702	0.0282926	5
509	0.47006	0.0165236	5	0.48718	0.0264575	5
510	0.51262	0.0226468	5	0.5344	0.039394	5
511	0.58438	0.0336058	5	0.6292	0.0589886	5
512	0.79142	0.0465204	5	0.8765	0.0913169	5
513	0.81892	0.0491962	5	0.90894	0.0889727	5
514	0.78654	0.0432192	5	0.83308	0.082613	5
515	0.7137	0.0358407	5	0.74636	0.0652831	5
516	0.67524	0.0415642	5	0.69124	0.0555471	5
517	0.68276	0.0476324	5	0.69216	0.0529463	5
518	0.65252	0.0453896	5	0.67452	0.0512924	5
519	0.70206	0.0570926	5	0.74426	0.0655966	5
520	0.76184	0.125883	5	0.78084	0.0881005	5
521	1.03884	0.288351	5	0.9744	0.084291	5
522	1.46382	0.35612	5	1.44904	0.1607	5
523	2.203	0.328242	5	2.2917	0.263736	5
524	2.59984	0.332817	5	2.80448	0.328091	5
525	2.14708	0.409464	5	2.73828	0.415953	5
526	1.88106	0.42039	5	2.38486	0.360135	5
527	1.78894	0.350592	5	2.19534	0.419505	5
528	1.43982	0.281616	5	1.80454	0.388398	5
529	1.19476	0.108471	5	1.65948	0.245365	5
530	1.12682	0.0968667	5	1.4444	0.221948	5
531	1.18266	0.232446	5	1.35846	0.252977	5
532	1.29402	0.345685	5	1.36568	0.317771	5
533	1.23962	0.197634	5	1.35438	0.249525	5
534	1.219	0.143529	5	1.16582	0.0956413	5
535	1.27468	0.0608921	5	1.27324	0.0373518	5
536	1.0361	0.0498628	5	1.09684	0.0334382	5
537	0.71606	0.0897544	5	0.7731	0.048994	5
538	0.63088	0.0983012	5	0.68728	0.0596428	5
539	0.612	0.0670638	5	0.67122	0.050552	5
540	0.77068	0.0710313	5	0.8862	0.109521	5
541	0.75624	0.043895	5	0.86644	0.102696	5
542	1.08604	0.0791778	5	1.14782	0.125334	5
543	1.65656	0.125486	5	1.58742	0.16543	5
544	2.2257	0.156092	5	2.31962	0.115593	5
545	2.55812	0.189652	5	3.028	0.304408	5
546	2.74488	0.22596	5	3.36364	0.375135	5
547	3.41896	0.341144	5	4.15816	0.408636	5
548	3.14824	0.281086	5	3.92608	0.406623	5
549	2.41716	0.180442	5	2.43528	0.267302	5
550	1.381	0.189464	5	1.3771	0.185657	5
551	0.89684	0.0932072	5	0.91022	0.111127	5
552	0.82896	0.0659604	5	1.0148	0.216082	5
553	0.63724	0.0308774	5	0.69878	0.0854376	5
554	0.46804	0.0177678	5	0.4942	0.0244063	5
555	0.4089	0.0085371	5	0.42192	0.0109363	5
556	0.39238	0.0231844	5	0.41554	0.010788	5
557	0.45706	0.0365914	5	0.47504	0.0174737	5
558	0.51906	0.0398255	5	0.58102	0.0306691	5
559	0.69322	0.0640709	5	0.72762	0.0403468	5
560	0.84012	0.0769447	5	0.83214	0.0448485	5
561	0.7503	0.0553142	5	0.75718	0.0459145	5
562	0.59772	0.0319244	5	0.6607	0.0407168	5
563	0.48878	0.019179	5	0.54284	0.0403457	5
564	0.44258	0.0200237	5	0.50064	0.037022	5
565	0.5312	0.0289239	5	0.56568	0.0516897	5
566	0.61722	0.0384591	5	0.63868	0.0393951	5
567	0.85534	0.0665222	5	0.87378	0.0222491	5
568	1.1755	0.0784665	5	1.20366	0.0337839	5
569	1.5167	0.152474	5	1.49434	0.0950656	5
570	1.58128	0.150442	5	1.58932	0.140666	5
571	1.60642	0.152043	5	1.6007	0.125758	5
572	1.81846	0.201473	5	1.75532	0.0669369	5
573	2.0374	0.22792	5	1.98214	0.191548	5
574	2.49286	0.305511	5	2.36	0.25746	5
575	2.81046	0.409428	5	2.89054	0.536935	5
576	3.56638	0.634693	5	3.19756	0.575537	5
577	3.7427	0.736228	5	3.2018	0.60407	5
578	4.22248	0.7993	5	3.39166	0.567453	5
579	4.26324	0.756271	5	3.61202	0.643844	5
580	4.4453	0.802532	5	3.79062	0.435875	5
581	3.88448	0.694894	5	3.18066	0.274868	5
582	3.44922	0.556263	5	2.89336	0.410946	5
583	2.96976	0.568136	5	2.46746	0.290266	5
584	2.31162	0.398335	5	1.7905	0.166309	5
585	2.03	0.31703	5	1.58422	0.187026	5
586	2.11116	0.35385	5	1.6178	0.279289	5
587	2.4412	0.416112	5	1.90628	0.319433	5
588	2.24866	0.399544	5	1.95782	0.321505	5
589	2.04436	0.352741	5	1.84036	0.22609	5
590	2.4976	0.330544	5	2.15474	0.176344	5
591	2.7201	0.282201	5	2.37224	0.197302	5
592	2.89788	0.288144	5	2.56534	0.283658	5
593	2.6939	0.38638	5	2.57128	0.339232	5
594	2.76862	0.454824	5	2.55578	0.331067	5
595	2.89958	0.397406	5	2.30414	0.235003	5
596	2.50444	0.326805	5	2.01836	0.214541	5
597	2.05566	0.268749	5	1.84252	0.262191	5
598	1.66442	0.19134	5	1.47564	0.150984	5
599	1.30196	0.105713	5	1.45812	0.0976048	5
600	1.24956	0.0906668	5	1.48186	0.102468	5
601	1.23498	0.115208	5	1.33368	0.107523	5
602	1.04198	0.0849402	5	1.27464	0.139463	5
603	0.84008	0.0632282	5	0.90248	0.0820953	5
604	0.78022	0.084546	5	0.76536	0.068267	5
605	0.7121	0.0314634	5	0.73126	0.0468808	5
606	0.81278	0.0434972	5	0.85512	0.0651071	5
607	1.02404	0.0589872	5	1.07842	0.0842888	5
608	1.16746	0.0919803	5	1.22304	0.0952669	5
609	1.3449	0.134837	5	1.35454	0.092191	5
610	1.27464	0.123634	5	1.32766	0.0913841	5
611	1.06828	0.0877042	5	1.12858	0.078802	5
612	0.90726	0.0589718	5	0.94774	0.0629996	5
613	0.83868	0.0466125	5	0.8758	0.0521369	5
614	0.89876	0.0638131	5	0.91624	0.0436769	5
615	0.86296	0.0648145	5	0.85582	0.0440833	5
616	0.93378	0.0706386	5	0.90622	0.0553848	5
617	0.80928	0.0632155	5	0.75922	0.0490755	5
618	0.78614	0.064733	5	0.72382	0.0424666	5
619	0.87766	0.078454	5	0.78624	0.0481993	5
620	0.81822	0.0677622	5	0.72612	0.0373826	5
621	0.72356	0.0572337	5	0.64786	0.0356708	5
622	0.8414	0.0770524	5	0.75364	0.0492394	5
623	1.03114	0.0958814	5	0.9223	0.0623982	5
624	1.16204	0.1096	5	1.06506	0.0750466	5
625	1.12874	0.111914	5	1.05788	0.0682267	5
626	1.28064	0.12225	5	1.20862	0.0657045	5
627	1.43974	0.133192	5	1.362	0.0775952	5
628	1.37064	0.133301	5	1.32422	0.0762592	5
629	1.46338	0.134995	5	1.45736	0.0805296	5
630	1.47248	0.125789	5	1.4844	0.0850653	5
631	1.47238	0.112052	5	1.51278	0.0899543	5
632	1.52332	0.0952918	5	1.59038	0.0888159	5
633	1.51798	0.0814589	5	1.5749	0.0715363	5
634	1.68902	0.109305	5	1.74512	0.0669178	5
635	1.73302	0.128974	5	1.76548	0.0723807	5
636	2.0643	0.219761	5	1.9606	0.0900594	5
637	2.5353	0.390018	5	1.998	0.0731376	5
638	3.24212	0.512572	5	2.5413	0.0990457	5
639	3.4595	0.544015	5	2.6454	0.121653	5
640	3.10304	0.56294	5	2.46452	0.0974887	5
641	2.66046	0.442879	5	2.27808	0.0926671	5
642	2.12012	0.306451	5	1.8791	0.0677675	5
643	1.6693	0.117171	5	1.71432	0.0651533	5
644	1.31436	0.070331	5	1.34616	0.0655271	5
645	1.17908	0.0791059	5	1.2109	0.07025	5
646	1.13608	0.0801222	5	1.15838	0.0705072	5
647	1.14566	0.0841711	5	1.16352	0.0707973	5
648	1.2884	0.109495	5	1.32038	0.0818251	5
649	1.51606	0.132942	5	1.52544	0.091786	5
Figure 4 F	Nano DSF fluorescence ratio at 37°C, n=3 biological repeats
	WT	I438V A524T	D HVR-1
	1.04164	1.05402	1.0555
	1.04261	1.05449	1.05633
	1.04186	1.05292	1.05621
Figure 4 S1B	Limited proteolysis quantification, normalised to band intensity at 4h, n= 3 biological repeats
Time (h)	WT			I438V A524T
0	0	0	0	0	0	0
0.0833333	0.00826907	0.000628899	0.0570144	0.0132774	0.00581683	0.0804187
0.166667	0.0727355	0.00625031	0.249825	0.085557	0.0165072	0.110765
0.25	0.092247	0.00899512	0.26386	0.200522	0.0412388	0.214331
0.333333	0.180061	0.117206	0.265483	0.250902	0.190931	0.335098
0.5	0.215003	0.236475	0.406416	0.532324	0.442043	0.510819
0.75	0.231831	0.369811	0.574333	0.835491	0.741949	0.712592
1	0.492655	0.397185	0.571151	1.088	0.817082	0.7294
2	0.703079	0.676378	0.61554	1.11135	1.47332	1.18064
3	0.78404	1	0.839568	1.16982	1.11613	1.2768
4	1	1	1	1	1	1
Figure 4 S4 B	Circular dichroism - proportion alpha helix, n=3 biological repeats
	WT	I438V A524T	D HVR-1
	0.068	0.069	0.066
	0.053	0.052	0.048
	0.053	0.048	0.042
Figure 4 S4 B	Circular dichroism - proportion beta strand, n=3 biological repeats
	WT	I438V A524T	D HVR-1
	0.348	0.428	0.452
	0.355	0.382	0.396
	0.368	0.404	0.41
Figure 4 S4 B	Circular dichroism - proportion turns, n=3 biological repeats
	WT	I438V A524T	D HVR-1
	0.219	0.201	0.193
	0.239	0.229	0.225
	0.232	0.227	0.22
Figure 4 S4 B	Circular dichroism - proportion unordered, n=3 biological repeats
	WT	I438V A524T	D HVR-1
	0.366	0.302	0.29
	0.353	0.337	0.331
	0.348	0.321	0.328

## Sheet: Figure 5
Figure 5 C	Infectious Titres - one representative experiment (n=16 technical repeats), values normalised for input particle number
	WT	I438V A524T	ΔHVR-1
	1759.46	15518.3	54451.8
	1746.44	17051.2	45255.8
	1510.18	14596.8	37315.6
	1699.47	16784	37129.9
	2056.31	19700.3	38534.8
	1908.3	13400.4	37758.4
	2369.04	16486.6	31294.4
	1947.76	18292.7	35786.2
	3037.98	14985.3	54712.4
	3723.27	23927.5	47999.3
	2003.37	21954.2	33688.4
	5189.16	38484.7	57791.1
	2855.82	31539.1	73438.9
	3766.09	24002.4	63489.9
	3775.56	23903.8	46202.3
	1405.65		60334
Figure 5 D	Infection of Receptor KO cells - values normalised (fraction) to parental Huh-7 cells, n= 3 biological repeats.
	WT			I438V A524T			ΔHVR-1
Huh-7 Parent	1	1	1	1	1	1	1	1	1
CD81	0	0	0	0.00771955	0	0	0.00643538	0	0
SR-B1	0.0388384	0.106398	0.141475	0.261489	0.519341	0.419	0.485295	0.698316	0.73925
Figure 5 E	Particle stability - values normalised to 0H (fraction), n=4 biological repeats
Time (H)	J6 WT				I438V A524T				DHVR-1
0	1	1	1	1	1	1	1	1	1	1	1	1
2	0.9038	1.307	0.7351	0.627005	0.6711	0.7801	0.622564	0.536694	0.5286	0.4788	0.376165	0.525068
4	0.6656	0.7788	0.3762	0.564314	0.4762	0.5139	0.340937	0.367399	0.1853	0.1477	0.233039	0.316638
6	0.5188	0.5411	0.2394	0.550891	0.3244	0.3631	0.142461	0.298464	0.1478	0.1456	0.121689	0.281552
8	0.4916	0.4046	0.1598	0.179875	0.193	0.2454	0.0434911	0.240754	0.0605	0.0774	0.0062704	0.207783
Figure 5 F	HCV+ Patient IgG Neutralisation - normalised to untreated control (percentage neutralisation), n=3 biological repeats
[IgG] µg/ml	WT			I438V A524T			DHVR-1
100	88.1215	65.33	69.14	100	98.38	100	100	100	100
30	98.7644	59.36	58.71	96.8744	99.55	100	99.2936	100	100
10	72.7811	50.69	51.26	96.6451	99.44	97.64	100	100	100
3	55.361	30.87	62.3	92.9465	98.95	87.07	100	100	100
1	53.3841	22.94	42.9	72.3762	97.64	72.55	99.9081	100	100
0.3	18.0228	26.63	39.14	17.8019	17.8	39.48	86.8074	96.29	94.09
0.1	50.9473	8.43	21.77	28.4572	28.46	22.91	35.0172	86.51	82.04
0.03	-26.719	0.98	9.05	5.36646	5.37	-0.17	26.5532	58.91	53.9
0.01	50.3601	21.7	5.7	23.2614	23.26	0.09	17.0619	19.19	33.19
0.003	-33.8216	20.23	21.55	12.4456	12.45	8.55	2.30509	12.07	25.79

## Sheet: Figure 6
Figure 6 A	Infectious Titres - one representative experiment (n=9 technical repeats), values normalised for input particle number
	WT	I438V A524T	S449P
	1247.47	4013.94	4223.79
	1890.05	4340.8	3258.77
	1674.96	3727.14	2466.26
	1277.7	4205.56	9723.88
	2194.41	5820.55	5140.8
	1007.4	6596	12224.5
	1198.13	4893.36	5613.68
	3418.23	5588.73	5491.92
	580.821	5808.69	4424.11
Figure 6 B	Infection of Receptor KO cells - values normalised (fraction) to parental Huh-7 cells, n= 3 biological repeats.
	WT			I438V A524T			S449P
Huh-7 Parent	1	1	1	1	1	1	1	1	1
CD81	0	0	0	0	0	0	0	0	0
SR-B1	0.176265	0.139014	0.0999547	0.734384	0.840101	0.432471	0.625541	0.49934	0.27818
Figure 6 C	Particle stability - values normalised to 0H (fraction), n=3 biological repeats
Time (H)	J6 WT			I438V A524T			S449P
0	1	1	1	1	1	1	1	1	1
2	0.7273	0.7939	0.63018	0.5887	0.4653	0.436994	0.5487	0.5838	0.436377
4	0.5598	0.7548	0.465523	0.4669	0.3206	0.225336	0.3932	0.4559	0.305858
6	0.474	0.7144	0.278349	0.3281	0.2472	0.213657	0.3385	0.3599	0.255692
8	0.3862	0.5019	0.220985	0.2235	0.1825	0.24507	0.3251	0.2703	0.104015
Figure 6 D	HCV+ Patient IgG Neutralisation - normalised to untreated control (percentage neutralisation), n=3 biological repeats
[IgG] µg/ml	WT			I438V A524T			S449P
100	49	83.487	44.69	99.65	100	100	96.25	100	100
30	64.21	51.796	36.27	100	100	100	98.56	100	100
10	46.33	52.65	30.04	99.47	98.319	100	96.18	93.77	100
3	38.21	22.079	36.21	99.43	98.634	96.93	90.15	79.37	82.82
1	35.03	36.506	42.98	97.83	83.961	80.45	86.83	57.95	75.67
0.3	-6.58	6.009	39.03	90.71	55.774	79.19	77.67	29.18	68.88
0.1	1.63	35.001	-12.86	53.26	28.435	49.4	46.07	-27.44	59.68
0.03	-6	15.781	15.45	18.73	3.92	43.01	17.69	-11.18	27.68
0.01	-29.19	-29.929	6.89	2.7	11.645	5.36	29.78	6.69	14.36
0.003	-10.63	-9.922	7.13	22.39	-0.431	0.23	18.4	5.85	11.68
Figure 6 F	MD simulations - average RMSF, n=5 independent simulations
	WT			I438V A524T			S449P
Residue	RMSF (Å)	SEM	N	RMSF (Å)	SEM	N	RMSF (Å)	SEM	N
384	14.9506	3.14277	5	6.02398	1.11948	5	6.47666	0.944399	5
385	13.559	3.07623	5	5.21946	1.05945	5	5.95342	1.0464	5
386	12.1808	3.05182	5	4.65072	1.10631	5	5.48616	1.13415	5
387	11.0036	3.09454	5	4.03964	1.12448	5	5.32866	1.05493	5
388	10.3267	3.04427	5	3.9904	1.13782	5	5.17054	0.97422	5
389	10.0492	2.95275	5	4.37622	1.22484	5	5.25192	0.914613	5
390	10.1512	2.80526	5	4.91754	1.37072	5	5.88522	0.87264	5
391	10.1049	2.6721	5	5.47038	1.41576	5	6.48796	0.933613	5
392	9.38428	2.73509	5	6.32406	1.26844	5	7.25084	1.04108	5
393	8.98948	2.59374	5	6.55964	1.19073	5	7.88864	1.26178	5
394	8.70036	2.41327	5	6.76992	1.09613	5	8.11564	1.34644	5
395	8.68826	2.29887	5	6.27366	1.01773	5	8.0413	1.30524	5
396	8.6224	2.1088	5	5.76552	1.00349	5	8.09284	1.26936	5
397	8.43544	1.945	5	5.631	1.02843	5	7.93	1.08403	5
398	7.89356	1.82775	5	5.61306	0.937958	5	7.67534	0.913033	5
399	7.46098	1.68142	5	5.42582	1.06354	5	6.98458	0.841212	5
400	7.00774	1.33835	5	5.18256	1.0631	5	6.10606	0.874167	5
401	6.69734	1.01547	5	4.51906	0.917802	5	5.6476	0.959584	5
402	6.53602	0.951804	5	3.8059	0.694306	5	5.1603	1.14997	5
403	6.82582	0.574389	5	3.42752	0.56354	5	5.05108	0.871801	5
404	6.84672	0.467515	5	3.4911	0.529967	5	5.01038	0.702799	5
405	6.08254	0.641383	5	3.84048	0.58243	5	5.2956	0.66116	5
406	5.85686	0.734444	5	4.20108	0.680894	5	5.24348	0.661852	5
407	5.83964	0.742651	5	4.34476	0.822091	5	5.09576	0.655132	5
408	5.03202	0.614387	5	3.9856	0.876001	5	4.27032	0.531707	5
409	4.00166	0.51684	5	3.31578	0.724048	5	3.33086	0.471507	5
410	3.05534	0.563526	5	3.04414	0.574238	5	2.53026	0.468319	5
411	2.789	0.568488	5	2.80654	0.459578	5	2.3763	0.552868	5
412	2.4215	0.566519	5	2.00332	0.221719	5	2.1484	0.542482	5
413	2.3654	0.511972	5	1.67744	0.144507	5	1.84716	0.443194	5
414	2.38882	0.541383	5	1.7746	0.23211	5	1.77008	0.44233	5
415	2.9409	0.668265	5	2.24606	0.248021	5	2.1807	0.438042	5
416	3.19776	0.63125	5	2.52036	0.219456	5	2.52632	0.49061	5
417	3.35394	0.229121	5	3.25134	0.282035	5	3.2815	0.556786	5
418	3.15524	0.203298	5	3.27544	0.21997	5	3.13358	0.531418	5
419	2.71158	0.26994	5	2.53516	0.152818	5	2.4934	0.405289	5
420	2.18852	0.23159	5	1.9008	0.0734872	5	2.09868	0.336785	5
421	1.68806	0.181196	5	1.48226	0.104886	5	1.77298	0.287439	5
422	1.30442	0.129955	5	1.21742	0.113645	5	1.4881	0.236168	5
423	1.11004	0.0375766	5	1.07796	0.112704	5	1.32476	0.225792	5
424	0.9835	0.0996741	5	0.97686	0.130293	5	0.99796	0.162805	5
425	0.78686	0.0990915	5	0.84058	0.067579	5	0.85124	0.117082	5
426	0.6415	0.0656405	5	0.66476	0.0537323	5	0.71632	0.099636	5
427	0.73756	0.0695356	5	0.77176	0.0421543	5	0.84498	0.094489	5
428	0.73358	0.0905306	5	0.82334	0.0366667	5	0.87126	0.0905711	5
429	0.86456	0.0866362	5	0.94816	0.0563192	5	1.07654	0.0655309	5
430	1.33672	0.111753	5	1.35554	0.126162	5	1.70238	0.108514	5
431	2.02408	0.235826	5	1.70858	0.205667	5	2.3858	0.0974715	5
432	2.25338	0.272469	5	2.08584	0.432275	5	2.77814	0.0825637	5
433	2.80662	0.228962	5	2.6809	0.494093	5	3.60934	0.0788877	5
434	2.83404	0.286938	5	3.01702	0.338176	5	3.81186	0.138836	5
435	2.63008	0.232504	5	2.85526	0.386404	5	3.45038	0.312981	5
436	2.44196	0.145114	5	2.60264	0.312012	5	2.5611	0.395278	5
437	2.06346	0.181464	5	2.08068	0.310754	5	1.90598	0.331159	5
438	1.78862	0.149114	5	1.85364	0.286786	5	1.79442	0.35727	5
439	1.98988	0.167784	5	2.01808	0.369158	5	1.98094	0.356195	5
440	1.88146	0.282718	5	1.81558	0.418556	5	1.71718	0.238887	5
441	1.65016	0.258864	5	1.7921	0.400068	5	1.78892	0.297471	5
442	1.82634	0.216615	5	2.0764	0.398842	5	2.42248	0.44131	5
443	2.14932	0.227682	5	2.25306	0.456193	5	2.66886	0.388329	5
444	2.67966	0.236299	5	2.8667	0.488843	5	3.15272	0.305484	5
445	3.21738	0.368636	5	3.292	0.549385	5	3.53106	0.273197	5
446	3.55354	0.443879	5	3.60568	0.589285	5	4.06958	0.385177	5
447	3.6028	0.327466	5	3.55276	0.614424	5	3.87004	0.395087	5
448	3.37676	0.298706	5	3.43534	0.619856	5	3.75746	0.427624	5
449	3.13584	0.321563	5	3.2016	0.562544	5	3.8138	0.464964	5
450	3.0888	0.38268	5	2.673	0.309608	5	3.6098	0.547764	5
451	2.62444	0.243392	5	2.06302	0.168762	5	2.89824	0.432059	5
452	2.24838	0.164356	5	1.75922	0.107851	5	2.02176	0.231669	5
453	2.57766	0.203939	5	2.14478	0.264364	5	2.13388	0.19694	5
454	2.96594	0.297727	5	2.75466	0.457147	5	2.67428	0.308473	5
455	2.71956	0.134851	5	2.93822	0.610415	5	2.8245	0.355791	5
456	2.0364	0.310364	5	2.45822	0.493215	5	2.1045	0.317255	5
457	2.13536	0.768932	5	2.39008	0.593914	5	1.74262	0.252362	5
458	1.9499	0.841415	5	2.33578	0.71841	5	1.38326	0.326659	5
459	1.77984	0.63918	5	2.00052	0.481354	5	1.53416	0.370975	5
460	2.19994	0.855701	5	2.37594	0.404203	5	1.99536	0.387002	5
461	2.59654	0.930744	5	3.02786	0.471961	5	2.40652	0.395634	5
462	2.89316	1.09017	5	3.46824	0.515977	5	2.83962	0.567526	5
463	2.63124	0.968719	5	3.20212	0.413927	5	2.9141	0.680999	5
464	2.45982	0.74381	5	3.19118	0.424689	5	2.95948	0.648312	5
465	2.92266	0.831445	5	3.5958	0.611613	5	3.24092	0.555804	5
466	3.0773	0.93228	5	3.75202	0.725256	5	3.62248	0.51607	5
467	2.94302	0.73432	5	3.78668	0.831078	5	3.95764	0.682217	5
468	3.0291	0.596529	5	4.20626	1.06494	5	4.10248	0.71314	5
469	2.88128	0.413017	5	4.20078	1.16163	5	4.55284	0.854721	5
470	3.30788	0.354313	5	5.01868	1.17987	5	5.49674	0.961858	5
471	3.8581	0.341353	5	5.9966	1.178	5	6.47316	1.20044	5
472	4.53592	0.365225	5	6.2005	1.1164	5	7.14986	1.39874	5
473	5.09264	0.428207	5	6.22396	1.33093	5	7.42338	1.39693	5
474	5.63236	0.673805	5	6.26964	1.78347	5	7.63228	1.36066	5
475	6.75452	0.994198	5	6.60718	1.94545	5	8.09716	1.26993	5
476	7.44964	1.16484	5	6.95754	2.00059	5	8.6061	1.1224	5
477	8.0746	1.37123	5	6.93398	1.83825	5	8.27098	0.991664	5
478	7.70954	1.35081	5	6.25722	1.61371	5	7.7046	1.06888	5
479	6.869	1.16336	5	5.7188	1.42768	5	6.3507	0.88841	5
480	6.01722	1.13783	5	5.20286	1.14665	5	4.8875	0.79039	5
481	5.37924	1.02968	5	5.10404	1.12756	5	4.07312	0.641097	5
482	4.94772	0.963366	5	4.81022	1.06119	5	3.72262	0.561673	5
483	4.65082	0.862163	5	4.80578	1.02322	5	3.73274	0.516504	5
484	3.63594	0.757869	5	4.05194	0.880501	5	3.04146	0.474215	5
485	2.6256	0.598287	5	3.12492	0.722261	5	2.22448	0.404003	5
486	2.00566	0.391038	5	2.4026	0.515594	5	1.91364	0.383984	5
487	1.6898	0.255567	5	2.10752	0.463655	5	1.54992	0.300855	5
488	1.32042	0.192749	5	1.68652	0.365553	5	1.36898	0.297067	5
489	1.18062	0.116773	5	1.44434	0.28	5	1.29838	0.245915	5
490	1.11066	0.122867	5	1.30526	0.249905	5	1.23306	0.225674	5
491	1.0284	0.104738	5	1.29996	0.304949	5	1.2733	0.23109	5
492	1.1632	0.132681	5	1.33464	0.318019	5	1.26812	0.204161	5
493	1.31876	0.178375	5	1.28434	0.284265	5	1.40322	0.243402	5
494	1.37538	0.221065	5	1.30814	0.249666	5	1.39726	0.212129	5
495	1.30224	0.266397	5	1.4927	0.200024	5	1.57188	0.313177	5
496	1.02206	0.163177	5	1.3349	0.189286	5	1.461	0.263438	5
497	0.96532	0.157085	5	1.23974	0.216293	5	1.20878	0.199578	5
498	0.85774	0.105412	5	0.96348	0.11257	5	1.00222	0.126404	5
499	0.6342	0.0552441	5	0.69482	0.0459681	5	0.77256	0.0869028	5
500	0.59912	0.0489923	5	0.67398	0.0636717	5	0.69972	0.0785931	5
501	0.56848	0.042577	5	0.64776	0.0660075	5	0.6429	0.0829211	5
502	0.60704	0.0349482	5	0.69184	0.0637702	5	0.67648	0.068022	5
503	0.54306	0.0314616	5	0.6497	0.0519518	5	0.65442	0.072679	5
504	0.4549	0.0246823	5	0.5225	0.0389823	5	0.56962	0.0685854	5
505	0.50088	0.0322222	5	0.54458	0.0276324	5	0.66026	0.0762473	5
506	0.55018	0.0368182	5	0.59174	0.0459869	5	0.672	0.0734009	5
507	0.56574	0.0336038	5	0.57918	0.0333987	5	0.64312	0.0633213	5
508	0.48232	0.0302598	5	0.49702	0.0282926	5	0.5584	0.0464641	5
509	0.47006	0.0165236	5	0.48718	0.0264575	5	0.52712	0.0399588	5
510	0.51262	0.0226468	5	0.5344	0.039394	5	0.58888	0.0486149	5
511	0.58438	0.0336058	5	0.6292	0.0589886	5	0.68552	0.0577538	5
512	0.79142	0.0465204	5	0.8765	0.0913169	5	0.92778	0.0746743	5
513	0.81892	0.0491962	5	0.90894	0.0889727	5	0.91766	0.0728632	5
514	0.78654	0.0432192	5	0.83308	0.082613	5	0.87584	0.0850321	5
515	0.7137	0.0358407	5	0.74636	0.0652831	5	0.79622	0.0834183	5
516	0.67524	0.0415642	5	0.69124	0.0555471	5	0.7846	0.077354	5
517	0.68276	0.0476324	5	0.69216	0.0529463	5	0.79112	0.0774194	5
518	0.65252	0.0453896	5	0.67452	0.0512924	5	0.72982	0.0807398	5
519	0.70206	0.0570926	5	0.74426	0.0655966	5	0.79566	0.110741	5
520	0.76184	0.125883	5	0.78084	0.0881005	5	0.94604	0.16603	5
521	1.03884	0.288351	5	0.9744	0.084291	5	1.22944	0.24242	5
522	1.46382	0.35612	5	1.44904	0.1607	5	1.67712	0.285343	5
523	2.203	0.328242	5	2.2917	0.263736	5	2.5428	0.400329	5
524	2.59984	0.332817	5	2.80448	0.328091	5	3.09112	0.416571	5
525	2.14708	0.409464	5	2.73828	0.415953	5	2.95904	0.466565	5
526	1.88106	0.42039	5	2.38486	0.360135	5	2.63228	0.522243	5
527	1.78894	0.350592	5	2.19534	0.419505	5	2.47092	0.489167	5
528	1.43982	0.281616	5	1.80454	0.388398	5	1.79954	0.331293	5
529	1.19476	0.108471	5	1.65948	0.245365	5	1.7895	0.313363	5
530	1.12682	0.0968667	5	1.4444	0.221948	5	1.38396	0.236574	5
531	1.18266	0.232446	5	1.35846	0.252977	5	1.52464	0.379479	5
532	1.29402	0.345685	5	1.36568	0.317771	5	1.5069	0.505864	5
533	1.23962	0.197634	5	1.35438	0.249525	5	1.83512	0.630907	5
534	1.219	0.143529	5	1.16582	0.0956413	5	1.80522	0.581595	5
535	1.27468	0.0608921	5	1.27324	0.0373518	5	2.08476	0.646332	5
536	1.0361	0.0498628	5	1.09684	0.0334382	5	1.82104	0.55695	5
537	0.71606	0.0897544	5	0.7731	0.048994	5	1.11032	0.30934	5
538	0.63088	0.0983012	5	0.68728	0.0596428	5	0.82668	0.143419	5
539	0.612	0.0670638	5	0.67122	0.050552	5	0.73662	0.0816344	5
540	0.77068	0.0710313	5	0.8862	0.109521	5	0.93868	0.105729	5
541	0.75624	0.043895	5	0.86644	0.102696	5	0.93788	0.114111	5
542	1.08604	0.0791778	5	1.14782	0.125334	5	1.18292	0.103927	5
543	1.65656	0.125486	5	1.58742	0.16543	5	1.80328	0.123244	5
544	2.2257	0.156092	5	2.31962	0.115593	5	2.53018	0.143067	5
545	2.55812	0.189652	5	3.028	0.304408	5	2.59416	0.15357	5
546	2.74488	0.22596	5	3.36364	0.375135	5	2.96126	0.2243	5
547	3.41896	0.341144	5	4.15816	0.408636	5	3.40338	0.326987	5
548	3.14824	0.281086	5	3.92608	0.406623	5	3.06416	0.359977	5
549	2.41716	0.180442	5	2.43528	0.267302	5	2.276	0.290294	5
550	1.381	0.189464	5	1.3771	0.185657	5	1.37916	0.123777	5
551	0.89684	0.0932072	5	0.91022	0.111127	5	0.89958	0.0714603	5
552	0.82896	0.0659604	5	1.0148	0.216082	5	0.92248	0.12017	5
553	0.63724	0.0308774	5	0.69878	0.0854376	5	0.74464	0.0986255	5
554	0.46804	0.0177678	5	0.4942	0.0244063	5	0.55078	0.0611856	5
555	0.4089	0.0085371	5	0.42192	0.0109363	5	0.47636	0.0390686	5
556	0.39238	0.0231844	5	0.41554	0.010788	5	0.49874	0.0423478	5
557	0.45706	0.0365914	5	0.47504	0.0174737	5	0.55374	0.0628178	5
558	0.51906	0.0398255	5	0.58102	0.0306691	5	0.6258	0.063701	5
559	0.69322	0.0640709	5	0.72762	0.0403468	5	0.77782	0.0678587	5
560	0.84012	0.0769447	5	0.83214	0.0448485	5	0.93222	0.0819359	5
561	0.7503	0.0553142	5	0.75718	0.0459145	5	0.86806	0.0871751	5
562	0.59772	0.0319244	5	0.6607	0.0407168	5	0.74676	0.0898675	5
563	0.48878	0.019179	5	0.54284	0.0403457	5	0.6287	0.0761419	5
564	0.44258	0.0200237	5	0.50064	0.037022	5	0.5747	0.0598581	5
565	0.5312	0.0289239	5	0.56568	0.0516897	5	0.67288	0.0838948	5
566	0.61722	0.0384591	5	0.63868	0.0393951	5	0.83624	0.120738	5
567	0.85534	0.0665222	5	0.87378	0.0222491	5	1.0519	0.126846	5
568	1.1755	0.0784665	5	1.20366	0.0337839	5	1.4307	0.19988	5
569	1.5167	0.152474	5	1.49434	0.0950656	5	1.74444	0.268896	5
570	1.58128	0.150442	5	1.58932	0.140666	5	1.80506	0.273602	5
571	1.60642	0.152043	5	1.6007	0.125758	5	1.86932	0.270066	5
572	1.81846	0.201473	5	1.75532	0.0669369	5	2.0635	0.290484	5
573	2.0374	0.22792	5	1.98214	0.191548	5	2.2465	0.344967	5
574	2.49286	0.305511	5	2.36	0.25746	5	2.5644	0.472614	5
575	2.81046	0.409428	5	2.89054	0.536935	5	2.67304	0.528121	5
576	3.56638	0.634693	5	3.19756	0.575537	5	2.98918	0.607263	5
577	3.7427	0.736228	5	3.2018	0.60407	5	2.91068	0.624449	5
578	4.22248	0.7993	5	3.39166	0.567453	5	3.01248	0.685658	5
579	4.26324	0.756271	5	3.61202	0.643844	5	3.05264	0.633168	5
580	4.4453	0.802532	5	3.79062	0.435875	5	3.43382	0.748601	5
581	3.88448	0.694894	5	3.18066	0.274868	5	3.25716	0.650422	5
582	3.44922	0.556263	5	2.89336	0.410946	5	3.2578	0.548735	5
583	2.96976	0.568136	5	2.46746	0.290266	5	2.72366	0.504063	5
584	2.31162	0.398335	5	1.7905	0.166309	5	2.24412	0.436474	5
585	2.03	0.31703	5	1.58422	0.187026	5	2.04	0.380718	5
586	2.11116	0.35385	5	1.6178	0.279289	5	2.0136	0.392745	5
587	2.4412	0.416112	5	1.90628	0.319433	5	2.24626	0.444272	5
588	2.24866	0.399544	5	1.95782	0.321505	5	2.09472	0.413198	5
589	2.04436	0.352741	5	1.84036	0.22609	5	1.92712	0.341198	5
590	2.4976	0.330544	5	2.15474	0.176344	5	2.34266	0.410489	5
591	2.7201	0.282201	5	2.37224	0.197302	5	2.68358	0.410556	5
592	2.89788	0.288144	5	2.56534	0.283658	5	3.13944	0.409387	5
593	2.6939	0.38638	5	2.57128	0.339232	5	3.24646	0.31421	5
594	2.76862	0.454824	5	2.55578	0.331067	5	3.0811	0.146085	5
595	2.89958	0.397406	5	2.30414	0.235003	5	2.93964	0.167812	5
596	2.50444	0.326805	5	2.01836	0.214541	5	2.32072	0.201305	5
597	2.05566	0.268749	5	1.84252	0.262191	5	1.781	0.208174	5
598	1.66442	0.19134	5	1.47564	0.150984	5	1.4927	0.169306	5
599	1.30196	0.105713	5	1.45812	0.0976048	5	1.49466	0.161662	5
600	1.24956	0.0906668	5	1.48186	0.102468	5	1.44228	0.169489	5
601	1.23498	0.115208	5	1.33368	0.107523	5	1.2576	0.157989	5
602	1.04198	0.0849402	5	1.27464	0.139463	5	1.05532	0.126847	5
603	0.84008	0.0632282	5	0.90248	0.0820953	5	0.82454	0.0829435	5
604	0.78022	0.084546	5	0.76536	0.068267	5	0.76032	0.0722884	5
605	0.7121	0.0314634	5	0.73126	0.0468808	5	0.73352	0.0695944	5
606	0.81278	0.0434972	5	0.85512	0.0651071	5	0.8198	0.0753909	5
607	1.02404	0.0589872	5	1.07842	0.0842888	5	1.02038	0.0876088	5
608	1.16746	0.0919803	5	1.22304	0.0952669	5	1.16972	0.0951462	5
609	1.3449	0.134837	5	1.35454	0.092191	5	1.36172	0.0837877	5
610	1.27464	0.123634	5	1.32766	0.0913841	5	1.23904	0.101922	5
611	1.06828	0.0877042	5	1.12858	0.078802	5	1.04552	0.0987987	5
612	0.90726	0.0589718	5	0.94774	0.0629996	5	0.89714	0.0929052	5
613	0.83868	0.0466125	5	0.8758	0.0521369	5	0.84012	0.0893937	5
614	0.89876	0.0638131	5	0.91624	0.0436769	5	0.89524	0.0934933	5
615	0.86296	0.0648145	5	0.85582	0.0440833	5	0.86792	0.0886172	5
616	0.93378	0.0706386	5	0.90622	0.0553848	5	0.94662	0.0911542	5
617	0.80928	0.0632155	5	0.75922	0.0490755	5	0.81538	0.0817745	5
618	0.78614	0.064733	5	0.72382	0.0424666	5	0.78208	0.0848845	5
619	0.87766	0.078454	5	0.78624	0.0481993	5	0.9026	0.108041	5
620	0.81822	0.0677622	5	0.72612	0.0373826	5	0.8463	0.0994282	5
621	0.72356	0.0572337	5	0.64786	0.0356708	5	0.73506	0.0850211	5
622	0.8414	0.0770524	5	0.75364	0.0492394	5	0.84078	0.10165	5
623	1.03114	0.0958814	5	0.9223	0.0623982	5	1.04532	0.126325	5
624	1.16204	0.1096	5	1.06506	0.0750466	5	1.14916	0.127739	5
625	1.12874	0.111914	5	1.05788	0.0682267	5	1.1036	0.115291	5
626	1.28064	0.12225	5	1.20862	0.0657045	5	1.2657	0.124022	5
627	1.43974	0.133192	5	1.362	0.0775952	5	1.4065	0.127285	5
628	1.37064	0.133301	5	1.32422	0.0762592	5	1.29482	0.129517	5
629	1.46338	0.134995	5	1.45736	0.0805296	5	1.35992	0.139994	5
630	1.47248	0.125789	5	1.4844	0.0850653	5	1.36856	0.137556	5
631	1.47238	0.112052	5	1.51278	0.0899543	5	1.39346	0.136473	5
632	1.52332	0.0952918	5	1.59038	0.0888159	5	1.4938	0.133101	5
633	1.51798	0.0814589	5	1.5749	0.0715363	5	1.53046	0.144473	5
634	1.68902	0.109305	5	1.74512	0.0669178	5	1.77528	0.135155	5
635	1.73302	0.128974	5	1.76548	0.0723807	5	1.83952	0.130704	5
636	2.0643	0.219761	5	1.9606	0.0900594	5	2.07552	0.188463	5
637	2.5353	0.390018	5	1.998	0.0731376	5	2.36014	0.299943	5
638	3.24212	0.512572	5	2.5413	0.0990457	5	2.87378	0.276842	5
639	3.4595	0.544015	5	2.6454	0.121653	5	2.9923	0.197364	5
640	3.10304	0.56294	5	2.46452	0.0974887	5	2.7047	0.176333	5
641	2.66046	0.442879	5	2.27808	0.0926671	5	2.46754	0.156321	5
642	2.12012	0.306451	5	1.8791	0.0677675	5	1.99832	0.142939	5
643	1.6693	0.117171	5	1.71432	0.0651533	5	1.71478	0.129308	5
644	1.31436	0.070331	5	1.34616	0.0655271	5	1.31824	0.126013	5
645	1.17908	0.0791059	5	1.2109	0.07025	5	1.14924	0.114304	5
646	1.13608	0.0801222	5	1.15838	0.0705072	5	1.08946	0.117058	5
647	1.14566	0.0841711	5	1.16352	0.0707973	5	1.08964	0.122868	5
648	1.2884	0.109495	5	1.32038	0.0818251	5	1.22164	0.12328	5
649	1.51606	0.132942	5	1.52544	0.091786	5	1.42462	0.115327	5
Figure 6 G	Infectious Titres - one representative experiment (mean of n=3 technical repeats), values normalised for input particle number
	IgG Selection	No Selection Control
	948	5591.4
Figure 6 H	HCV+ Patient IgG Neutralisation - normalised to untreated control (percentage neutralisation), n=2 technical repeats
	IgG Selection		No Selection Control
100	70.8761	63.5136	100	100
30	50.7733	59.0846	100	100
10	50.6314	20.424	100	100
3	22.804	2.08374	100	100
1	-11.7992	9.7397	100	100
0.3	6.19089	4.42359	95.0498	97.6782
0.1	34.922	-26.716	78.6617	38.3487
0.03	1.98201	-7.71333	29.6269	73.2213
0.01	10.1561	-5.48941	-3.29527	58.4687
0.003	-19.7059	-36.0706	38.4655	61.216
Figure 6 I	Mutation frequency ater 6 rounds with and without IgG selection.
IgG Selected			No Selection
Mutation	Frequency (%)		Mutation	Frequency (%)
L258V	6.8		M264T	8.9
M484V	10.8		R317H	86.4
I633V	7.1		T387A	89.9
			M405T	5
			R408G	92.4
Figure 6 J	HCV+ Patient IgG Neutralisation - normalised to untreated control (percentage neutralisation), n=3 biological repeats, HCVpp
[IgG] µg/ml	WT			I438V A524T			R317H T387A R408G
100	38.75	83.21	64.15	98.84	100	100	99.88	100	100
30	36.62	80.65	26.77	98.31	100	100	98.8	100	100
10	48.78	64.7	19.07	97.19	98.27	98.27	99.12	100	100
3	31.53	54.17	47.68	87.34	95.81	95.19	99.19	100	100
1	19.43	48.07	12.62	82.04	92.86	92.86	98.01	95.27	94.46
0.3	16.02	37.46	12.73	74.34	68.58	68.58	92.08	84.06	94.99
0.1	27.57	33.9	17.64	50.03	23.62	23.62	77.18	73.95	70.21
0.03	23.21	14.54	22.64	30.63	-13.14	-13.14	65.76	52.47	48.84
0.01	24.44	24.94	6.42	42.19	-24.61	-24.61	46.35	56.05	23.31
0.003	17.24	30.43	20.35	13.8	-14.2	-14.2	18.49	5.01	-3.78
Figure 6 K	Infection of Receptor KO cells - values normalised (fraction) to parental Huh-7 cells, one representative experiment (n= 4 technical repeats)
	WT				I438V A524T				R317H T387A R408G
Huh-7 Parent	0.86	0.87	0.86	1.4	0.74	0.46	0.9	1.9	0.9	1.17	1.11	0.83
CD81	0	0	0	0	0	0	0	0	0	0	0	0
SR-B1	0.4	0.25	0.3	0.32	1.39	0.34	0.44	0.91	1.58	0.93	0.86	1.09
Figure 6 L	HCV+ Patient IgG Neutralisation - normalised to untreated control (percentage neutralisation), n=5 biological repeats, HCVpp
[IgG] µg/ml	J6 WT					J6 I438V A524T					H77 WT					H77 L438V A524T
100	2	62	16	-11	18	98	97	97	98	99	85	88	93	50	91	97	97	99	99	97
30	-17	55	14	-5	2	94	97	97	95	97	78	78	83	91	80	97	97	100	99	97
10	-20	49	-3	10	-5	86	94	89	81	92	67	62	70	83	68	97	97	99	99	98
3	-9	53	-14	-17	-23	74	87	73	76	83	44	38	56	74	48	95	95	98	97	96
1	-5	50	-7	-7	-19	53	72	48	50	68	31	22	44	63	31	83	82	94	91	85
0.3	-21	34	-4	-28	-3	25	47	31	36	50	5	0	28	53	17	49	54	80	78	64
0.1	0	34	-6	-23	3	11	40	10	9	29	-12	1	22	32	16	35	42	60	60	32
0.03	1	22	-7	-10	-29	0	32	10	4	22	-11	0	12	31	2	11	26	46	48	16
0.01	2	21	-2	-38	15	2	15	0	19	15	-18	0	16	27	-3	-7	8	40	38	1
Figure 6 M	Infection of Receptor KO cells - values normalised (fraction) to parental Huh-7 cells, n= 5 biological repeats, HCVpp
	H77 WT					H77 L438V A524T					H77 WT					H77 L438V A524T
Huh-7 Parent	1	1	1	1	1	1	1	1	1	1	1	1	1	1	1	1	1	1	1	1
CD81	-0.083	0.006	0.005455	-0.01545	-0.03864	-0.005833	-0.0005	-0.002727	-0.005455	-0.005909	-0.0001667	0.0015	0.0004545	0	0	-0.01633	0.004	0.002727	-0.01364	-0.009545
SR-B1	0.142	0.3255	0.2359	0.3705	0.04091	0.2957	1.081	0.6995	0.6727	0.2432	0.04833	0.153	0.1327	0.1491	0.03864	0.2785	0.568	0.4073	0.5505	0.15
Figure 6 N	MD simulations - average RMSF, n=5 independent simulations
	H77 WT			H77 L438V A524T
Residue	RMSF (Å)	SEM	N	RMSF (Å)	SEM	N
384	11.9677	2.4219	5	12.0306	1.4916	5
385	10.3609	2.29623	5	10.3783	1.54063	5
386	8.941	2.11751	5	9.1899	1.4669	5
387	8.03588	1.9728	5	7.82006	1.34501	5
388	7.65536	1.97168	5	6.27358	1.51172	5
389	7.37578	1.97653	5	4.58444	1.13492	5
390	7.04408	2.02444	5	3.30524	0.992901	5
391	6.2998	1.91917	5	2.57566	0.700551	5
392	5.42472	1.85467	5	2.28078	0.737276	5
393	5.26296	1.72376	5	2.22206	0.791891	5
394	4.89302	1.52192	5	1.92476	0.590741	5
395	4.04126	1.28682	5	1.51414	0.323865	5
396	3.64636	1.1992	5	1.57694	0.408452	5
397	3.83818	1.00882	5	1.72224	0.373891	5
398	3.50344	0.708612	5	1.63952	0.296148	5
399	3.10656	0.65067	5	1.6792	0.309098	5
400	3.71124	0.826904	5	1.97528	0.421726	5
401	4.20818	0.899314	5	2.15286	0.441206	5
402	3.7532	0.743199	5	2.866	0.669737	5
403	3.69172	0.629573	5	3.14788	0.832577	5
404	4.46836	0.62483	5	3.28522	0.739196	5
405	5.52728	0.523186	5	3.3279	0.904995	5
406	5.77956	0.158073	5	2.86332	0.930218	5
407	5.21534	0.177739	5	2.41826	0.975496	5
408	4.89798	0.359777	5	2.10112	0.831979	5
409	4.4981	0.50466	5	1.83834	0.798096	5
410	4.15958	0.615307	5	1.63294	0.733722	5
411	3.81102	0.624254	5	1.6048	0.787943	5
412	3.49312	0.610787	5	1.63698	0.846857	5
413	3.3406	0.639885	5	1.7348	0.893054	5
414	3.18774	0.382476	5	2.25866	1.03352	5
415	3.48284	0.199438	5	2.79918	0.94424	5
416	3.6198	0.405973	5	3.29912	1.02072	5
417	3.96586	0.496759	5	3.14696	1.118	5
418	4.0878	0.465186	5	2.54628	1.03636	5
419	3.67854	0.498818	5	2.09456	0.937055	5
420	3.25016	0.505836	5	1.72652	0.771031	5
421	2.41558	0.355899	5	1.27294	0.443024	5
422	1.90474	0.206431	5	1.14748	0.518025	5
423	1.57732	0.194968	5	0.9794	0.486228	5
424	1.1533	0.161196	5	0.7157	0.256728	5
425	0.80976	0.091054	5	0.55856	0.172172	5
426	0.62532	0.0749205	5	0.65204	0.204611	5
427	0.7126	0.105712	5	0.7534	0.298309	5
428	0.72008	0.125696	5	0.85392	0.258795	5
429	0.89348	0.114816	5	1.22436	0.351286	5
430	1.36844	0.161748	5	1.65218	0.39418	5
431	1.84198	0.100656	5	1.7972	0.493201	5
432	2.17972	0.293527	5	2.10396	0.333934	5
433	2.49922	0.265483	5	2.10886	0.229879	5
434	2.6753	0.218655	5	1.83226	0.195917	5
435	2.28384	0.193105	5	1.68778	0.164872	5
436	1.76086	0.146034	5	1.35454	0.250426	5
437	1.4964	0.178663	5	1.11546	0.262621	5
438	1.27832	0.113754	5	1.27624	0.426845	5
439	1.39348	0.127809	5	1.28598	0.502703	5
440	1.3166	0.101565	5	1.1623	0.434319	5
441	1.23998	0.107069	5	1.32328	0.518825	5
442	1.4203	0.126054	5	1.57092	0.646768	5
443	1.61504	0.150869	5	1.92142	0.751987	5
444	2.28528	0.193167	5	2.114	0.786499	5
445	2.45504	0.364498	5	2.57762	0.779327	5
446	2.73762	0.480394	5	2.82804	0.759393	5
447	2.87904	0.47052	5	3.28374	0.689727	5
448	3.38532	0.490122	5	3.66186	0.65347	5
449	3.6756	0.449543	5	3.37768	0.405371	5
450	3.65686	0.486454	5	2.706	0.320327	5
451	3.08878	0.275908	5	2.03704	0.215188	5
452	2.4174	0.204096	5	2.11232	0.288581	5
453	2.89546	0.256442	5	2.25516	0.248264	5
454	3.38152	0.311683	5	2.26736	0.231342	5
455	3.05092	0.367591	5	2.38208	0.184383	5
456	2.81436	0.342664	5	2.25812	0.313962	5
457	2.40552	0.308361	5	2.08894	0.400996	5
458	2.1461	0.221563	5	1.95374	0.409468	5
459	1.94572	0.135452	5	2.38462	0.503176	5
460	2.44312	0.216776	5	2.92898	0.892926	5
461	3.13422	0.270502	5	3.45974	0.978791	5
462	4.15958	0.364962	5	3.61884	0.849879	5
463	4.65202	0.469656	5	4.0401	1.06073	5
464	5.27972	0.605885	5	4.85164	1.56782	5
465	6.19598	0.602791	5	5.52658	1.70169	5
466	6.9508	0.594022	5	6.18076	1.84138	5
467	7.7158	0.663131	5	7.03676	2.04156	5
468	8.28884	0.53754	5	7.69614	1.86181	5
469	8.7128	0.648256	5	8.05386	2.08383	5
470	8.8624	0.624969	5	8.39524	2.2827	5
471	8.87424	0.641925	5	8.29916	2.31958	5
472	8.69964	0.636832	5	8.24556	2.18477	5
473	8.66766	0.613871	5	8.11102	2.34448	5
474	8.67776	0.464422	5	7.92858	2.42892	5
475	8.24514	0.447416	5	7.29922	2.15331	5
476	7.78336	0.512137	5	6.61658	2.00922	5
477	7.20928	0.546079	5	6.08784	1.78798	5
478	6.3712	0.653195	5	5.11904	1.40435	5
479	5.72006	0.590385	5	4.3637	0.896044	5
480	5.11006	0.387402	5	4.27566	0.744117	5
481	4.75572	0.268913	5	3.70736	0.585867	5
482	4.25292	0.233828	5	2.87164	0.432927	5
483	3.5405	0.235064	5	2.3049	0.387395	5
484	2.78148	0.243167	5	1.88676	0.313424	5
485	2.12452	0.144479	5	1.55728	0.195283	5
486	1.64012	0.102371	5	1.37442	0.21794	5
487	1.338	0.102088	5	1.16362	0.193005	5
488	1.10692	0.0655731	5	1.06118	0.190022	5
489	1.03216	0.0631784	5	1.16974	0.168467	5
490	1.20004	0.110201	5	1.22076	0.189532	5
491	1.25144	0.177911	5	0.94722	0.0945914	5
492	0.96554	0.0835784	5	0.74498	0.106879	5
493	0.7284	0.0173668	5	0.599	0.0997472	5
494	0.58656	0.0334577	5	0.69044	0.102008	5
495	0.7177	0.0682311	5	0.59158	0.0883347	5
496	0.63674	0.0667189	5	0.49106	0.0633825	5
497	0.5349	0.0461993	5	0.4628	0.0704905	5
498	0.5241	0.0500031	5	0.4295	0.071521	5
499	0.51028	0.0653694	5	0.48088	0.0936684	5
500	0.5333	0.0798935	5	0.4538	0.0648258	5
501	0.49126	0.0540691	5	0.41986	0.0543573	5
502	0.45418	0.0445563	5	0.44346	0.0883328	5
503	0.5269	0.0499446	5	0.5108	0.128105	5
504	0.57136	0.0662822	5	0.58322	0.157914	5
505	0.57714	0.0795809	5	0.42266	0.0823602	5
506	0.44642	0.0394958	5	0.37832	0.0764379	5
507	0.38922	0.0231467	5	0.41104	0.104563	5
508	0.3937	0.0381989	5	0.47078	0.151525	5
509	0.42986	0.0473534	5	0.66816	0.181092	5
510	0.62506	0.05603	5	0.7054	0.187877	5
511	0.6611	0.0629949	5	0.673	0.170529	5
512	0.65186	0.065926	5	0.63224	0.132866	5
513	0.64556	0.0551806	5	0.54808	0.129744	5
514	0.5721	0.0530966	5	0.55902	0.096658	5
515	0.58964	0.0563759	5	0.52484	0.0676314	5
516	0.54578	0.0552749	5	0.61314	0.109809	5
517	0.60486	0.0668569	5	0.62152	0.14845	5
518	0.63212	0.0976267	5	0.70082	0.181329	5
519	0.737	0.114511	5	1.06494	0.335504	5
520	1.13978	0.184227	5	1.79992	0.593646	5
521	1.79962	0.29007	5	2.28276	0.633378	5
522	2.29934	0.308019	5	1.87606	0.56325	5
523	1.96878	0.38391	5	1.36806	0.397186	5
524	1.64984	0.323302	5	1.33122	0.3203	5
525	1.42764	0.291996	5	1.13134	0.326559	5
526	1.10958	0.241741	5	1.24848	0.315673	5
527	1.09618	0.167427	5	1.05708	0.356261	5
528	0.91558	0.157105	5	0.93372	0.718427	5
529	1.02688	0.350019	5	0.9775	0.855476	5
530	1.12802	0.379993	5	1.0304	0.640843	5
531	1.17542	0.279208	5	0.9357	0.480344	5
532	0.96864	0.160075	5	0.9844	0.419583	5
533	1.0476	0.172093	5	0.78704	0.188342	5
534	0.9712	0.131024	5	0.53272	0.105426	5
535	0.6552	0.0825665	5	0.47682	0.0942128	5
536	0.55082	0.0772971	5	0.48472	0.0793075	5
537	0.53202	0.0573775	5	0.56872	0.0923578	5
538	0.59604	0.066506	5	0.54628	0.0875718	5
539	0.5349	0.0433113	5	0.7282	0.118484	5
540	0.67044	0.0431017	5	1.09566	0.512365	5
541	0.76042	0.107844	5	1.5618	0.86593	5
542	0.93096	0.202817	5	1.86924	1.42047	5
543	0.9014	0.217895	5	2.07514	1.61867	5
544	0.93416	0.17278	5	1.87622	1.02664	5
545	1.09418	0.0849045	5	1.92652	0.749576	5
546	1.51402	0.257953	5	1.59076	0.761513	5
547	1.25502	0.313211	5	0.8454	0.27762	5
548	0.70868	0.0773502	5	0.57598	0.18304	5
549	0.4809	0.0367314	5	0.53186	0.179195	5
550	0.46972	0.041423	5	0.44992	0.125517	5
551	0.39784	0.015902	5	0.37486	0.0748046	5
552	0.34564	0.00865729	5	0.35426	0.0453269	5
553	0.34846	0.00703964	5	0.3413	0.0462353	5
554	0.35002	0.00749636	5	0.38046	0.0673657	5
555	0.3945	0.0248394	5	0.46368	0.0843352	5
556	0.46612	0.0345614	5	0.61318	0.141499	5
557	0.5914	0.049844	5	0.7673	0.168391	5
558	0.69536	0.0473262	5	0.68396	0.1345	5
559	0.63288	0.0252394	5	0.55934	0.0915307	5
560	0.55286	0.0197129	5	0.45216	0.0498006	5
561	0.46602	0.0165937	5	0.4066	0.0406333	5
562	0.42258	0.018682	5	0.45778	0.0630333	5
563	0.46396	0.0180198	5	0.46034	0.0864411	5
564	0.42436	0.011765	5	0.53764	0.115606	5
565	0.4677	0.0145099	5	0.67102	0.139742	5
566	0.5859	0.0184	5	0.7888	0.164105	5
567	0.66896	0.0281176	5	0.9319	0.213251	5
568	0.80472	0.0458093	5	1.07026	0.260725	5
569	0.96228	0.0481072	5	1.29962	0.308115	5
570	1.13888	0.0641991	5	1.72066	0.544429	5
571	1.5664	0.0930998	5	2.41782	0.709147	5
572	2.31042	0.284238	5	3.77348	0.817425	5
573	3.44518	0.388334	5	5.1993	0.669065	5
574	4.80744	0.311807	5	5.36424	0.660944	5
575	5.37974	0.282104	5	4.91706	0.870802	5
576	5.22558	0.273843	5	4.155	0.729067	5
577	4.44068	0.191462	5	3.08042	0.495828	5
578	3.3622	0.13895	5	2.27002	0.294587	5
579	2.26428	0.109094	5	1.55244	0.237734	5
580	1.43546	0.0557614	5	1.37252	0.249394	5
581	1.30674	0.0395729	5	1.5276	0.26435	5
582	1.42096	0.0452025	5	1.88154	0.343443	5
583	1.83876	0.0769542	5	1.91538	0.38449	5
584	2.31946	0.290851	5	2.0193	0.301106	5
585	2.4116	0.179591	5	2.81598	0.40516	5
586	3.14208	0.295735	5	4.16342	1.12837	5
587	4.0496	0.555771	5	5.06914	1.15446	5
588	4.12672	0.483404	5	5.82934	1.38551	5
589	4.30956	0.445282	5	6.36822	1.2579	5
590	4.72246	0.586004	5	6.84018	1.60352	5
591	5.38296	0.840662	5	6.38896	1.78659	5
592	5.33254	1.08321	5	6.17792	2.03621	5
593	5.5642	1.41687	5	5.04268	1.69939	5
594	4.78328	1.40225	5	3.8532	1.0751	5
595	3.62636	0.949336	5	2.91384	0.380217	5
596	2.64754	0.523172	5	1.9237	0.241275	5
597	1.8912	0.166737	5	1.47592	0.21276	5
598	1.49916	0.102241	5	1.10074	0.213559	5
599	1.05862	0.0545965	5	0.94852	0.211642	5
600	0.93158	0.0621579	5	0.77584	0.119554	5
601	0.80654	0.0523202	5	0.82164	0.181499	5
602	0.80828	0.0453832	5	0.95548	0.187109	5
603	0.92846	0.0553707	5	1.12296	0.160595	5
604	1.12724	0.0656396	5	1.30062	0.148999	5
605	1.30106	0.0694209	5	1.23544	0.125225	5
606	1.27736	0.0825631	5	1.02698	0.122166	5
607	1.07242	0.069585	5	0.87628	0.103533	5
608	0.91852	0.0554378	5	0.7481	0.0879309	5
609	0.78608	0.0510407	5	0.74622	0.093188	5
610	0.803	0.055152	5	0.72396	0.117467	5
611	0.77866	0.0553658	5	0.79212	0.134351	5
612	0.85642	0.0452962	5	0.69456	0.0992567	5
613	0.76334	0.0428328	5	0.66172	0.0849773	5
614	0.74358	0.0419084	5	0.74686	0.100552	5
615	0.80854	0.033506	5	0.6942	0.108592	5
616	0.74	0.0276847	5	0.642	0.0750292	5
617	0.69794	0.0309798	5	0.7443	0.0801992	5
618	0.79968	0.0304554	5	0.96076	0.090183	5
619	1.00586	0.0403463	5	1.06528	0.0612401	5
620	1.1442	0.0402971	5	1.00386	0.0622663	5
621	1.09868	0.0482985	5	1.17992	0.0738411	5
622	1.24986	0.0431343	5	1.33246	0.0785971	5
623	1.40608	0.0571757	5	1.1996	0.0756833	5
624	1.30386	0.0723863	5	1.22258	0.0835906	5
625	1.33684	0.0778291	5	1.21246	0.0911751	5
626	1.30796	0.0756524	5	1.22158	0.0938037	5
627	1.28298	0.0686583	5	1.35258	0.109063	5
628	1.36468	0.0619696	5	1.51788	0.177871	5
629	1.39472	0.0468632	5	1.90254	0.319406	5
630	1.65642	0.0574931	5	2.03358	0.431978	5
631	1.77498	0.0598059	5	2.38718	0.620941	5
632	2.07652	0.0968414	5	2.6012	0.844446	5
633	2.21882	0.16819	5	3.29912	1.03919	5
634	2.85402	0.228231	5	3.62454	1.01092	5
635	3.07398	0.227058	5	3.30418	0.92288	5
636	2.73022	0.214189	5	2.89158	0.689446	5
637	2.40502	0.161804	5	2.20538	0.469386	5
638	1.90226	0.106785	5	1.82444	0.260455	5
639	1.63608	0.0452961	5	1.29488	0.152268	5
640	1.2257	0.0361981	5	1.027	0.100395	5
641	1.04128	0.0492246	5	0.97112	0.0870076	5
642	1.01182	0.0577189	5	0.9623	0.0825197	5
643	1.04052	0.0645457	5	1.11578	0.087484	5
644	1.21694	0.0807599	5	1.35098	0.100736	5
645	1.46432	0.0953662	5	1.2109	0.07025	5
