# Supplementary figures and images for: An entropic safety catch controls hepatitis C virus entry and antibody resistance
Source: eLife journal article supplement (doi:10.7554/elife.71854), 2022-07-07

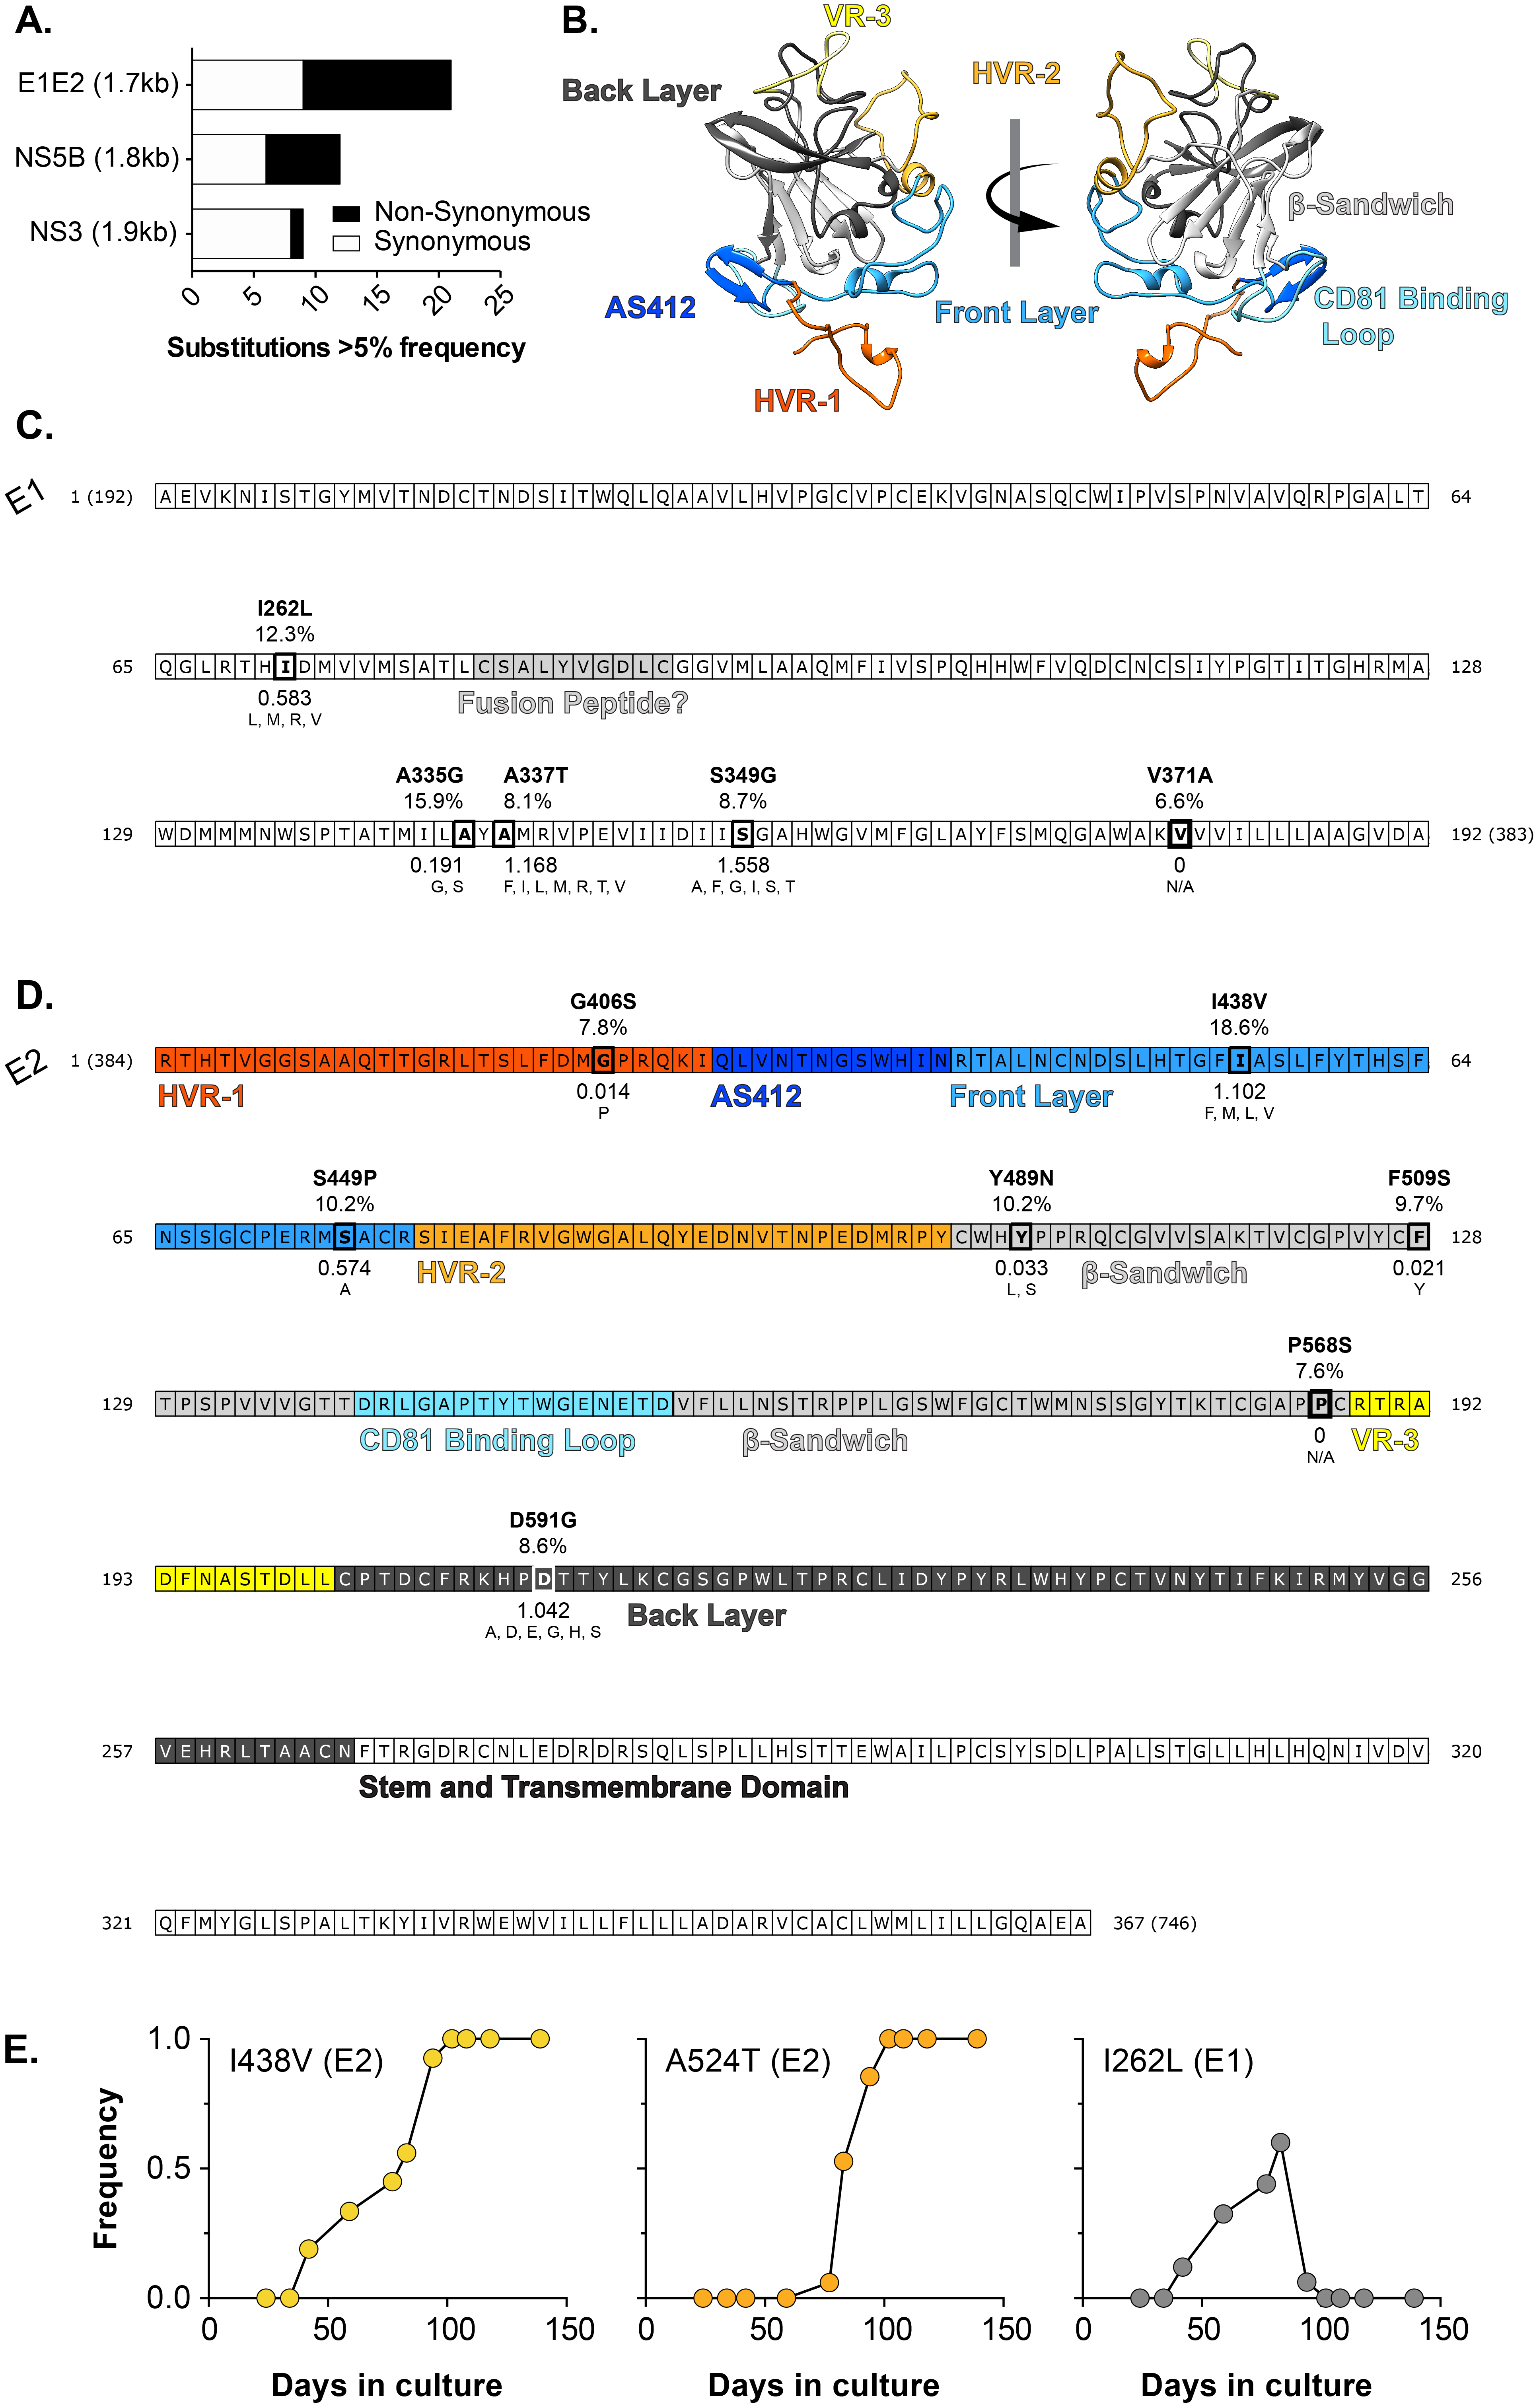

Supplement: supp [file elife-71854-supp-v1.zip › elife_poa_e71854_Figure_1_figure_supplement_1.jpg]

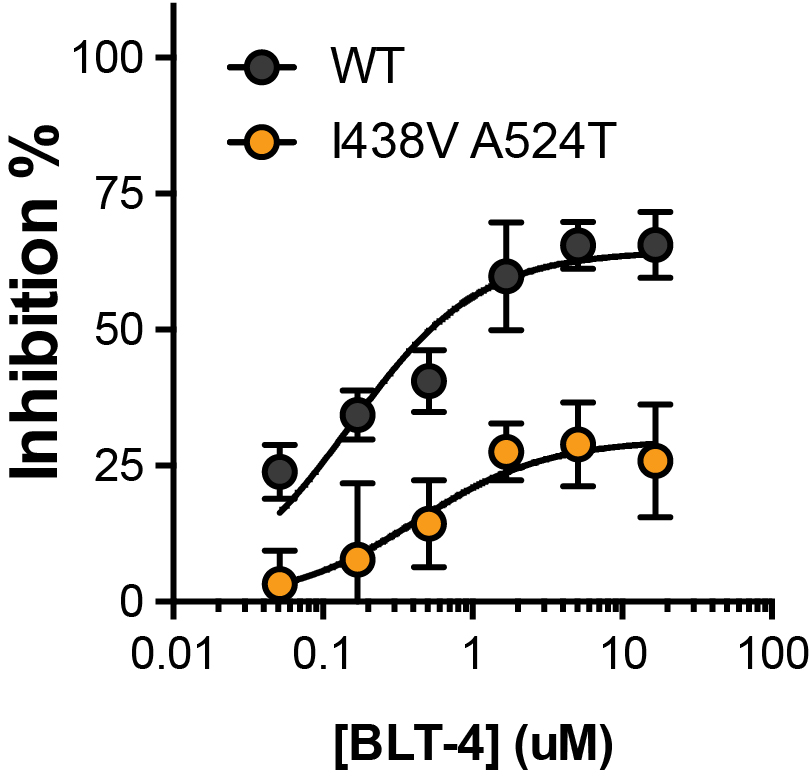

Supplement: supp [file elife-71854-supp-v1.zip › elife_poa_e71854_Figure_1_figure_supplement_2.jpg]

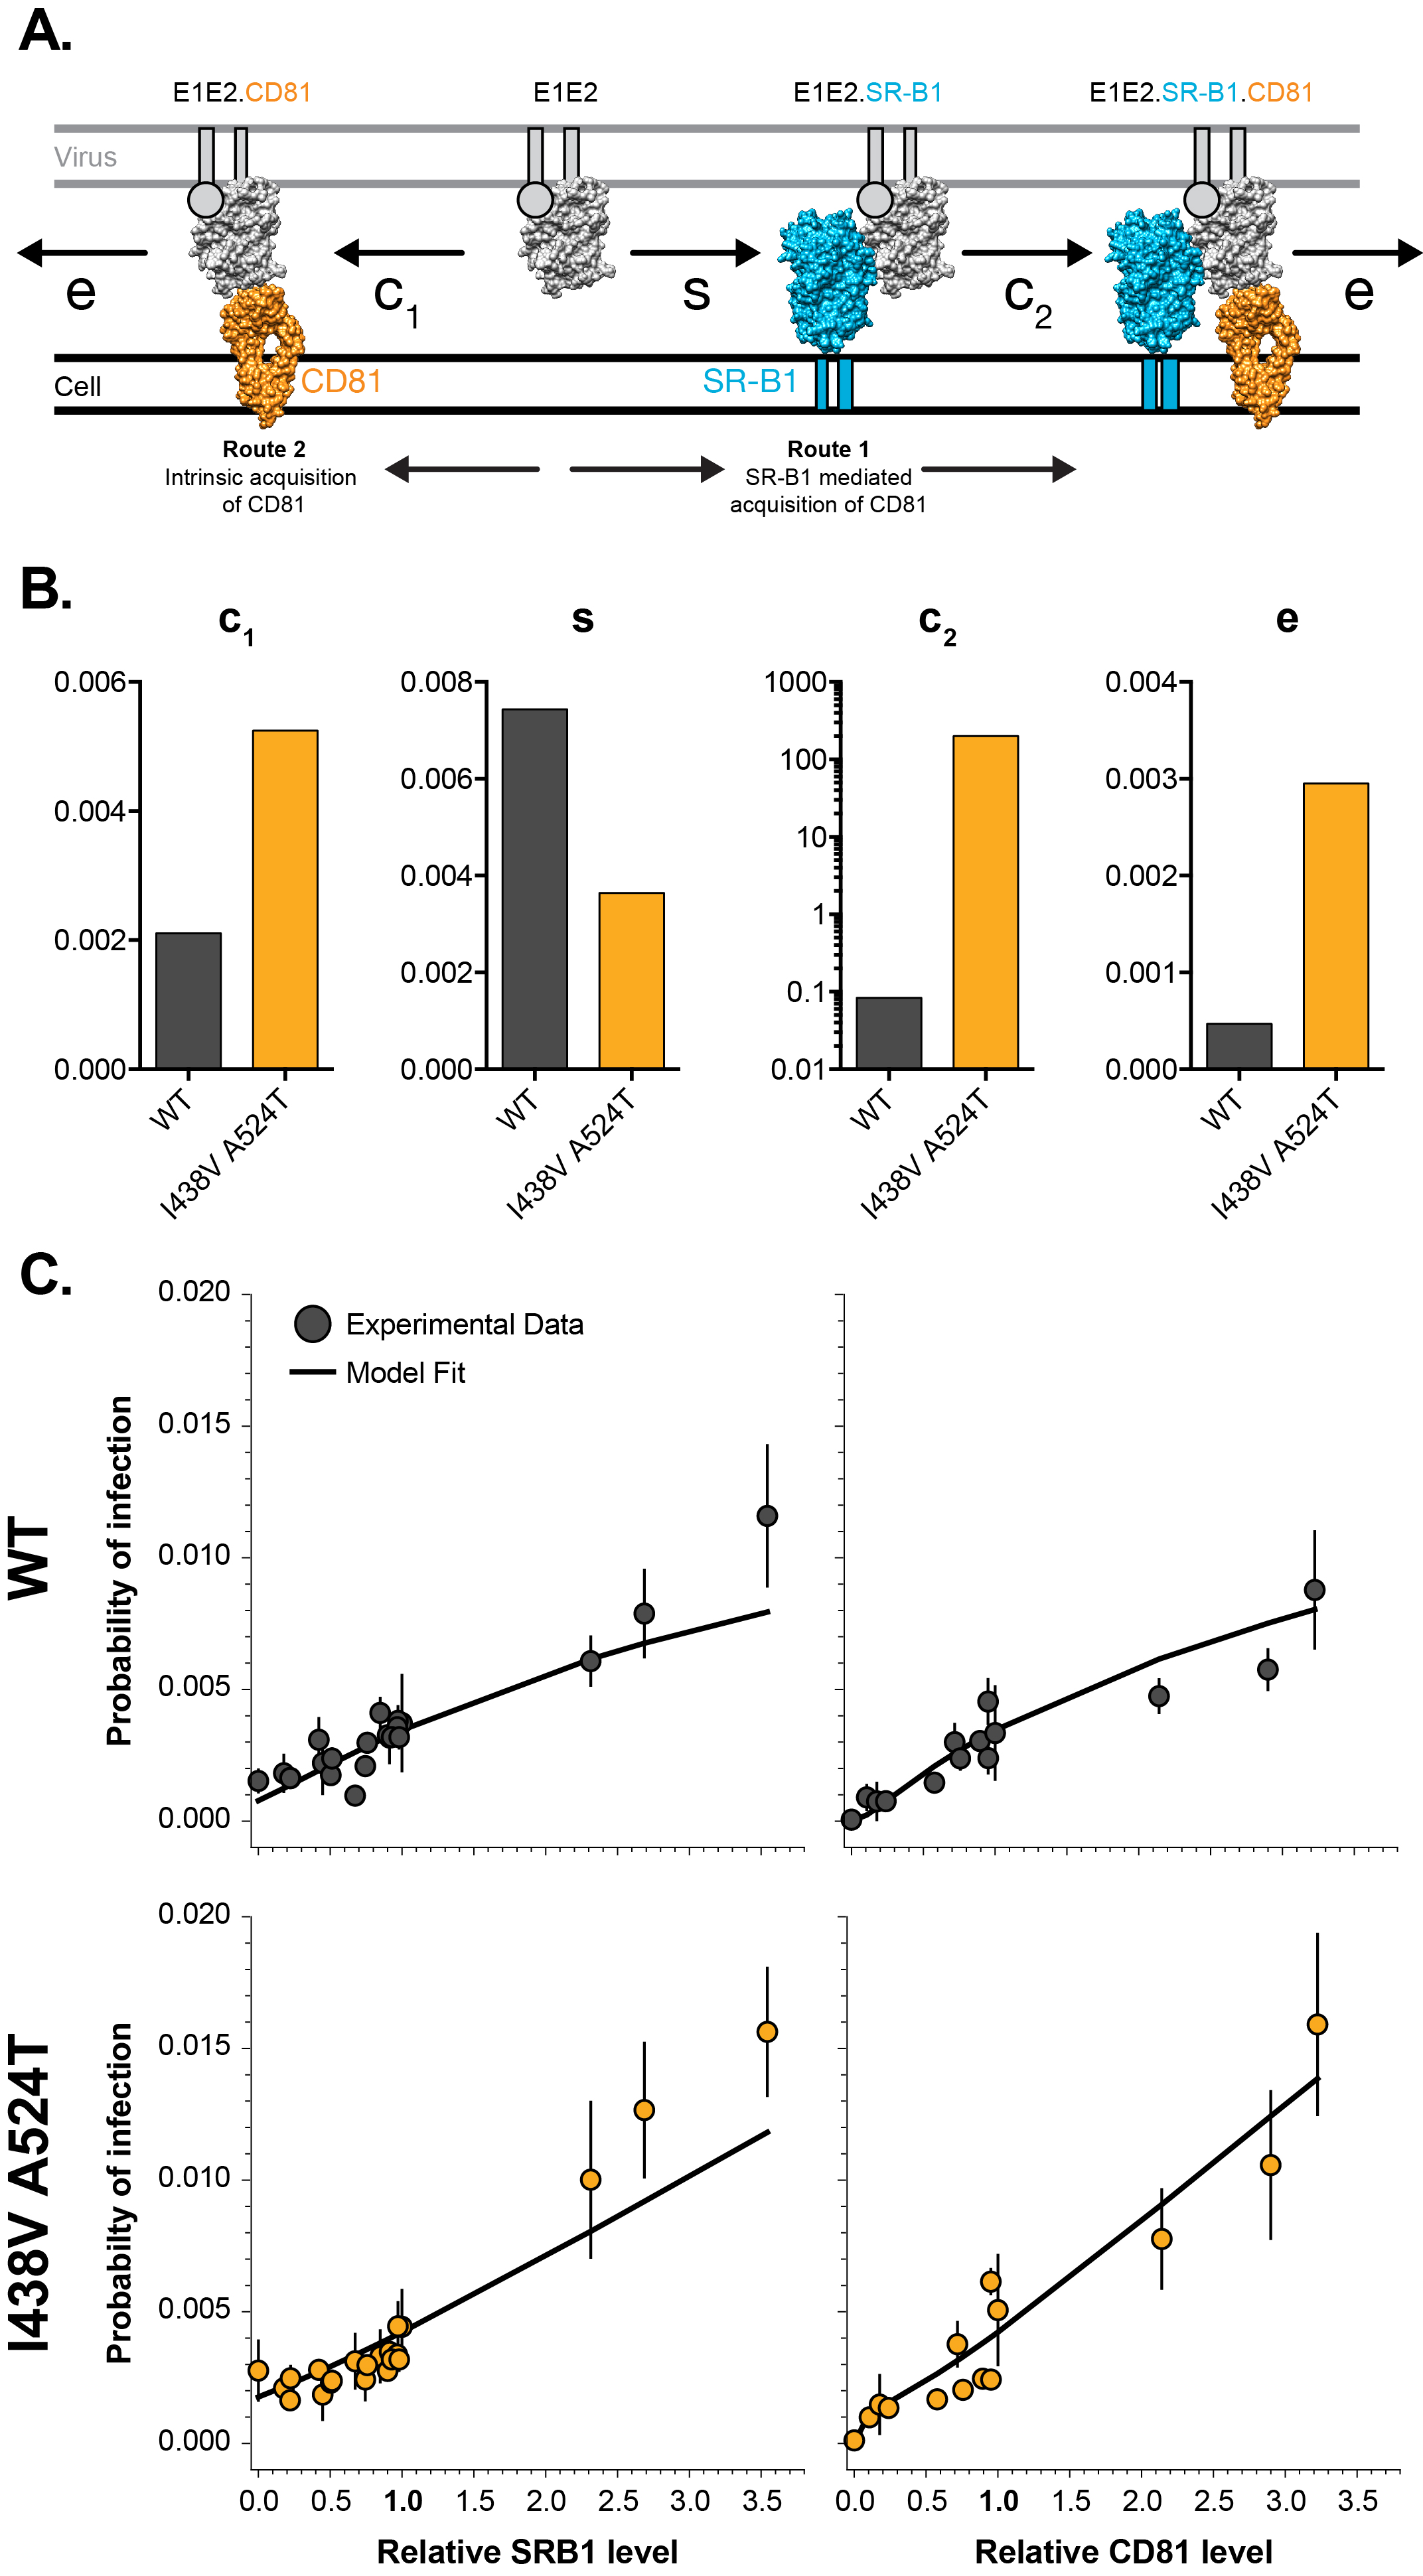

Supplement: supp [file elife-71854-supp-v1.zip › elife_poa_e71854_Figure_2_figure_supplement_1.jpg]

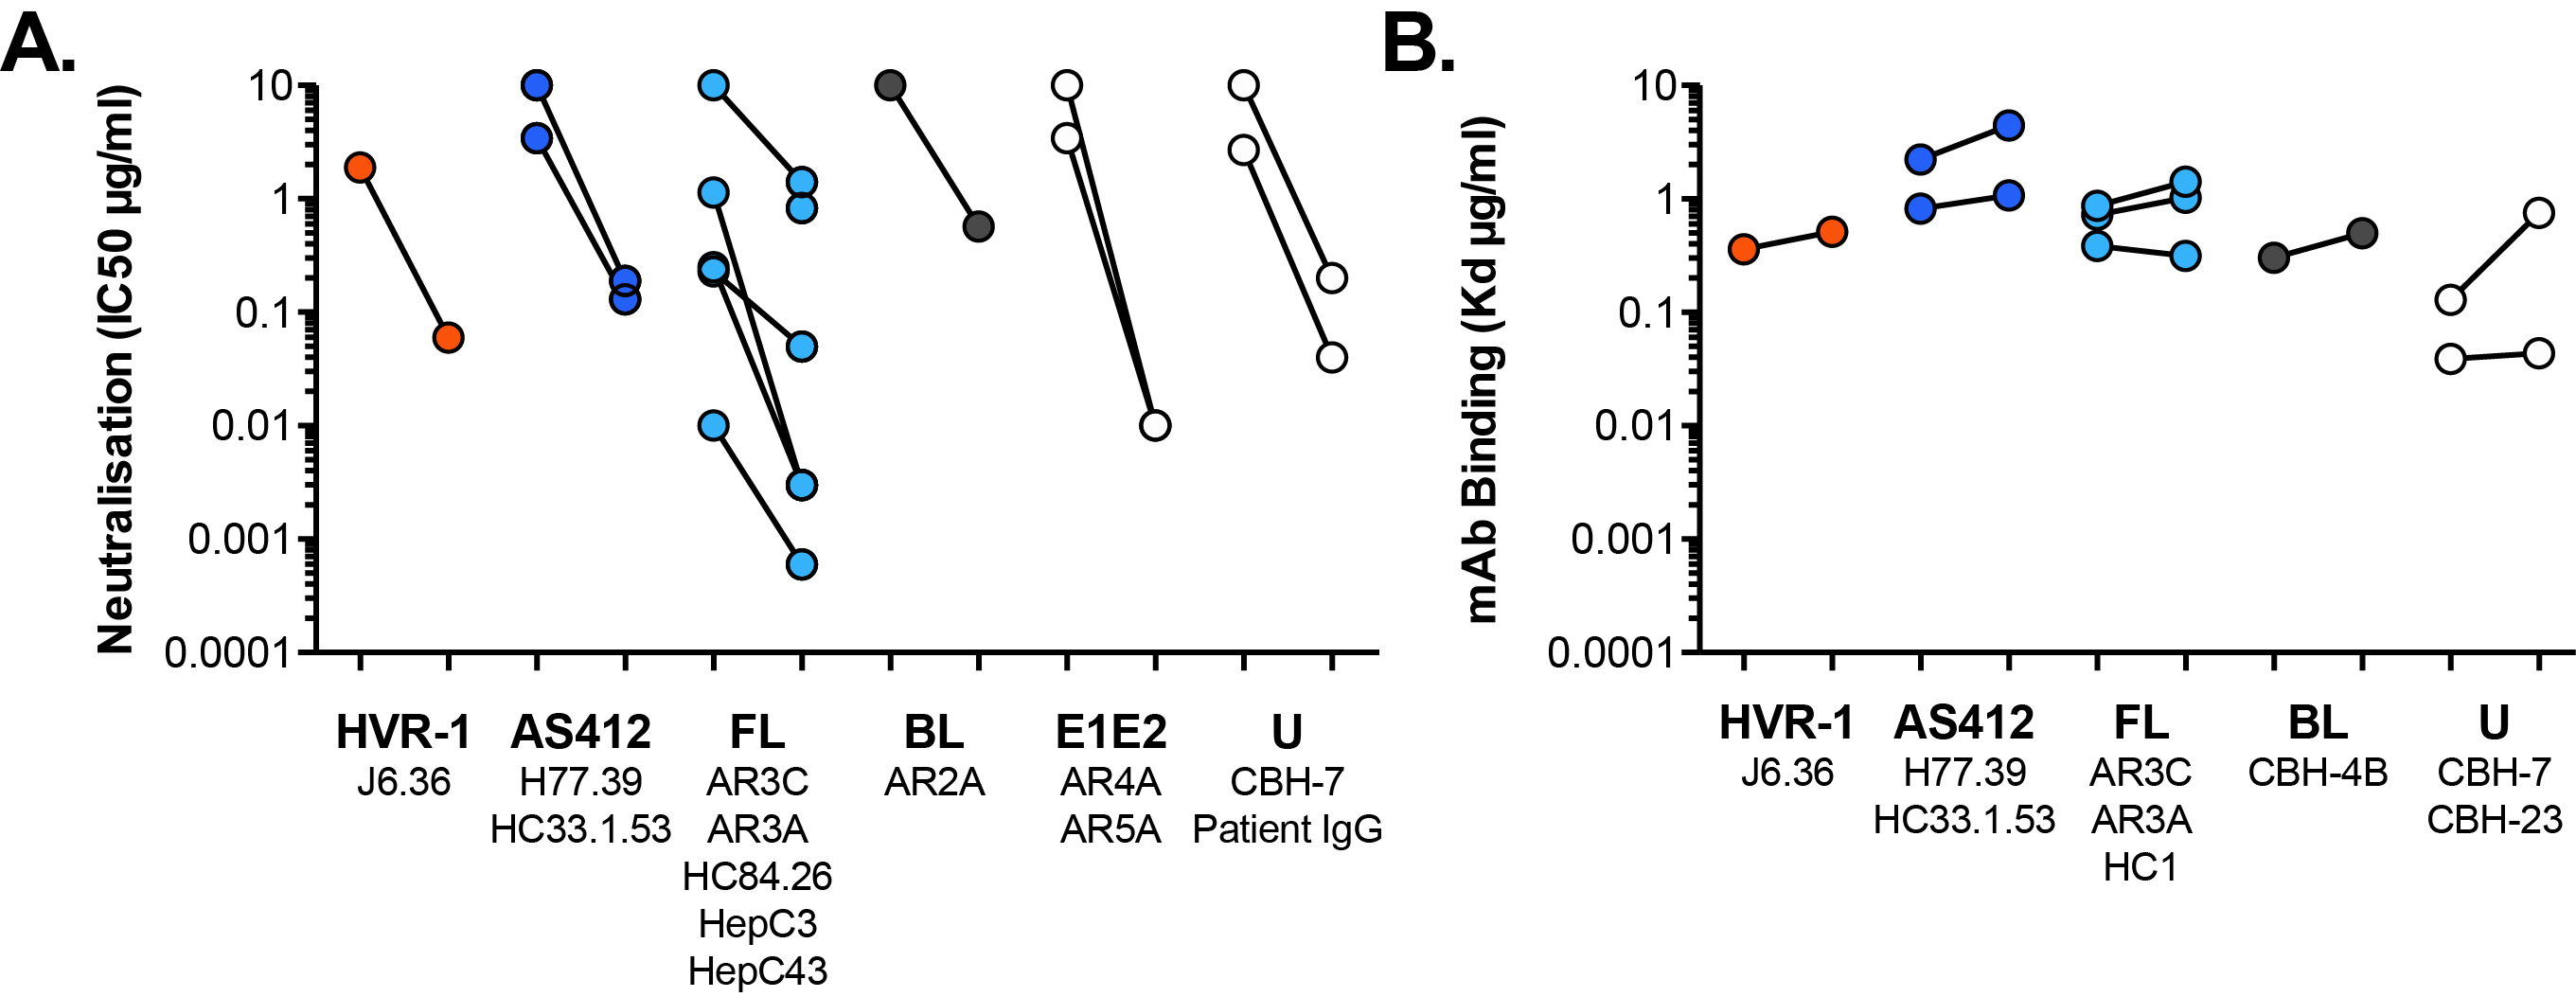

Supplement: supp [file elife-71854-supp-v1.zip › elife_poa_e71854_Figure_3_figure_supplement_1.jpg]

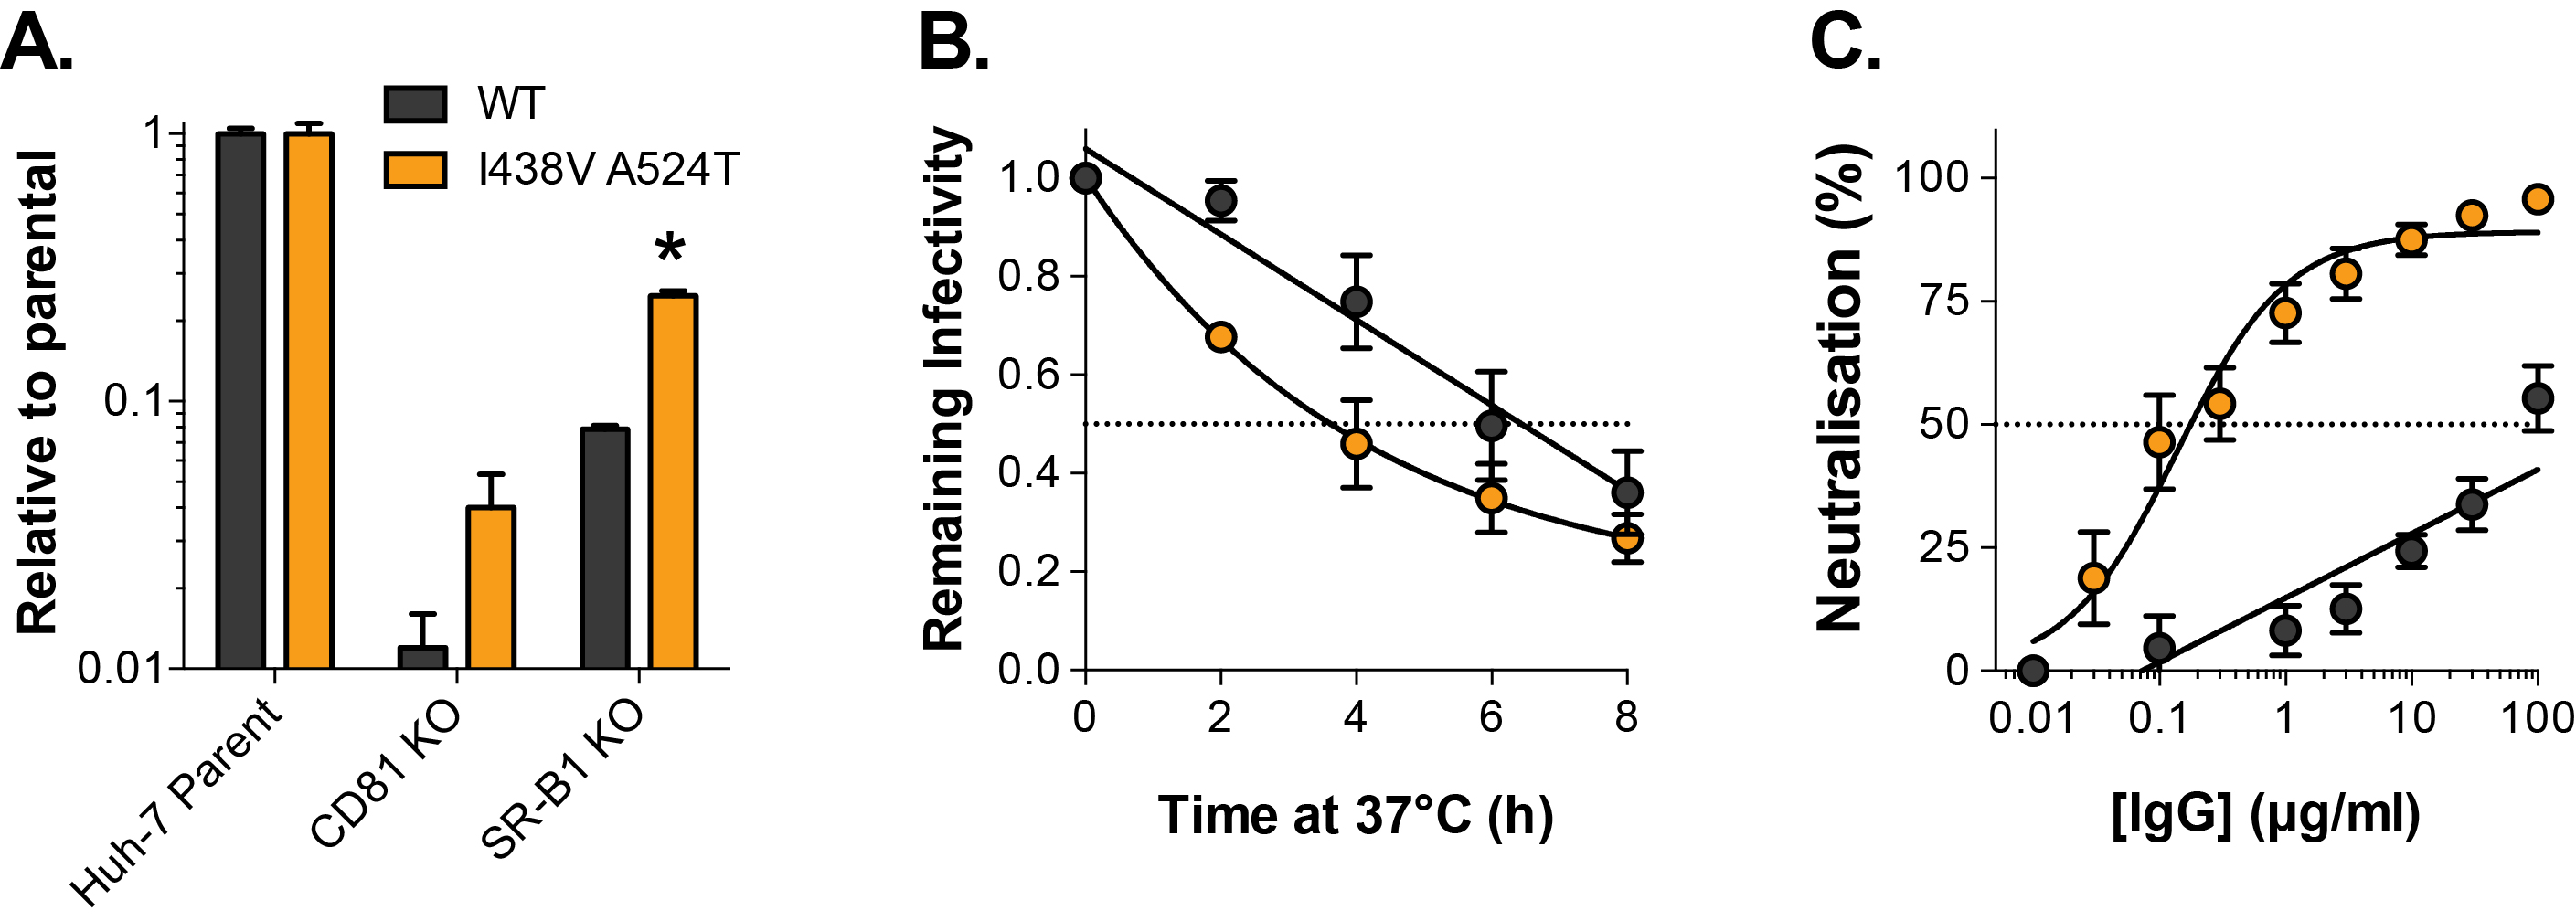

Supplement: supp [file elife-71854-supp-v1.zip › elife_poa_e71854_Figure_3_figure_supplement_2.jpg]

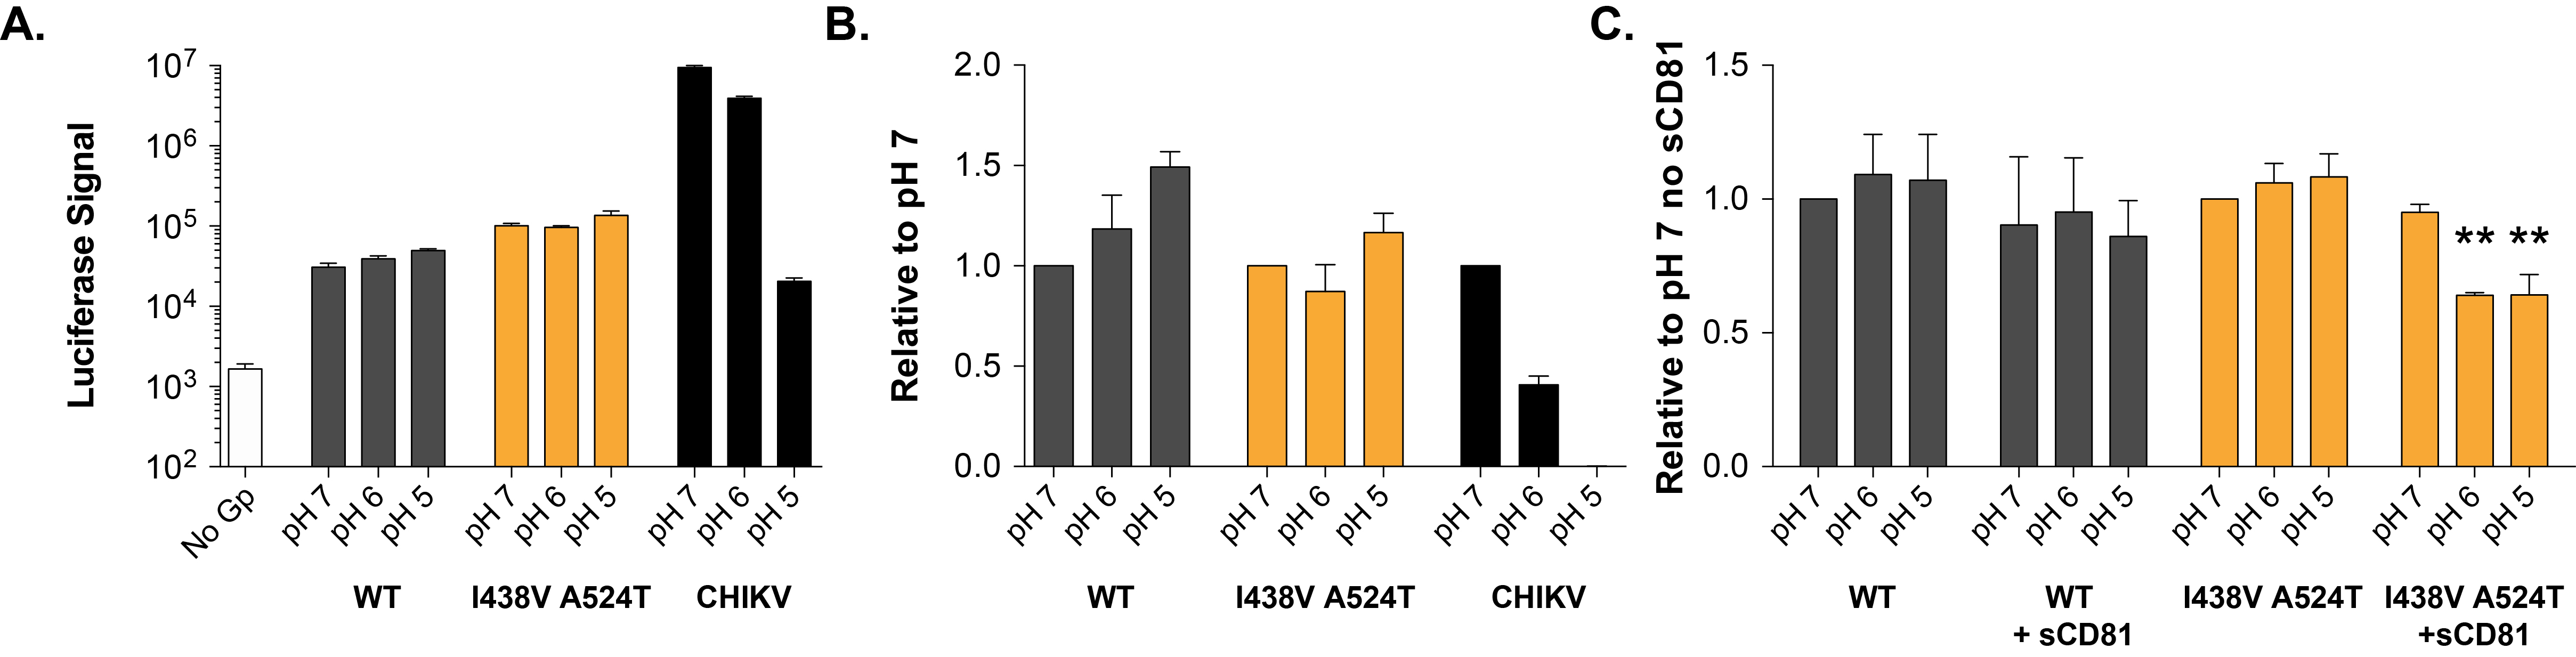

Supplement: supp [file elife-71854-supp-v1.zip › elife_poa_e71854_Figure_3_figure_supplement_3.jpg]

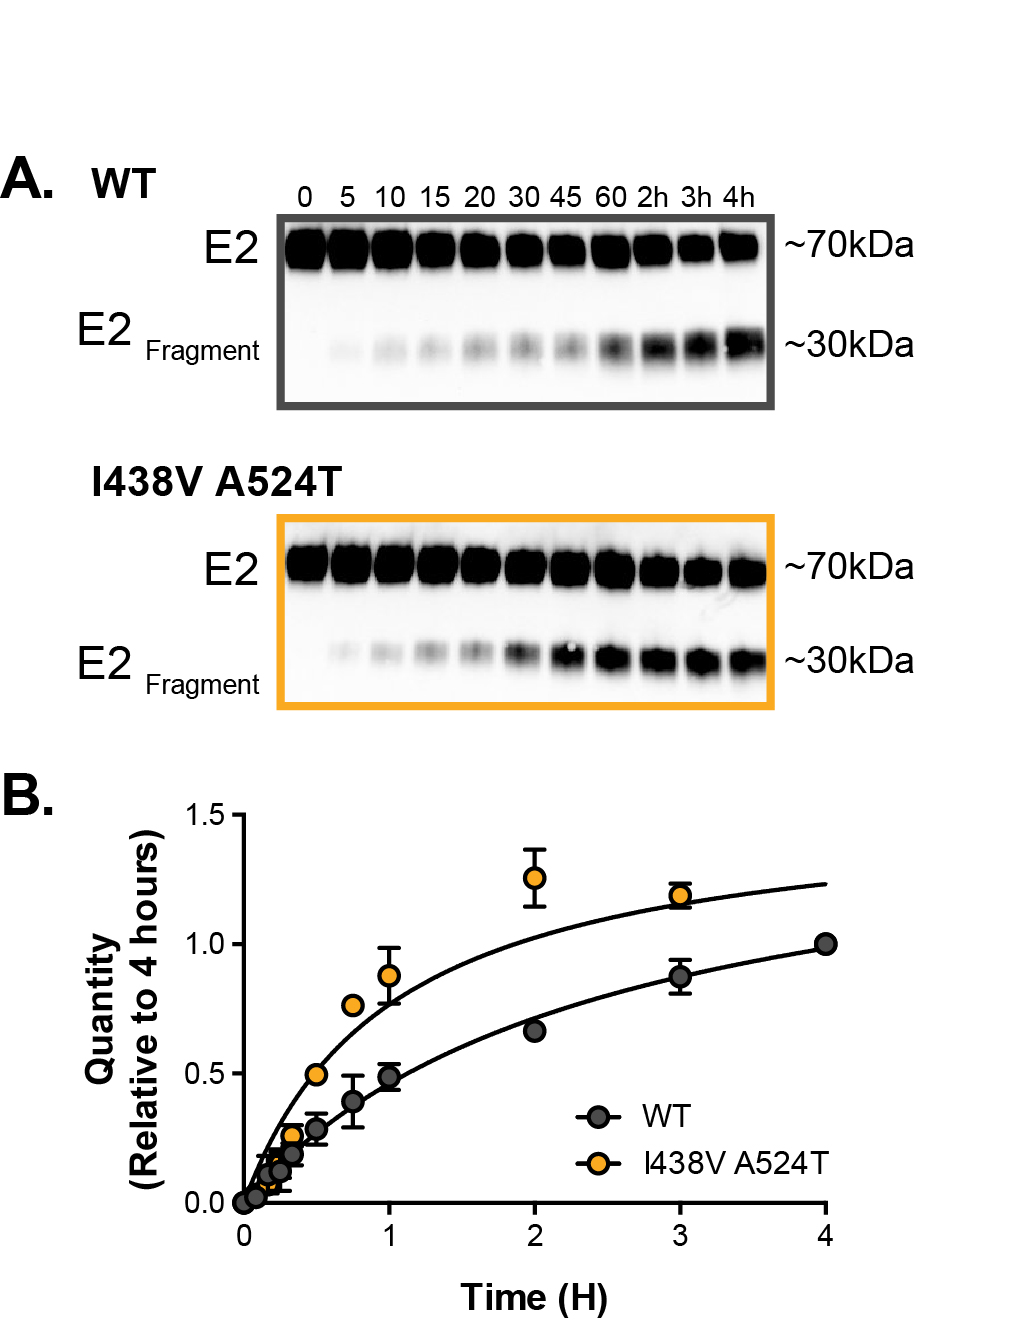

Supplement: supp [file elife-71854-supp-v1.zip › elife_poa_e71854_Figure_4_figure_supplement_1.jpg]

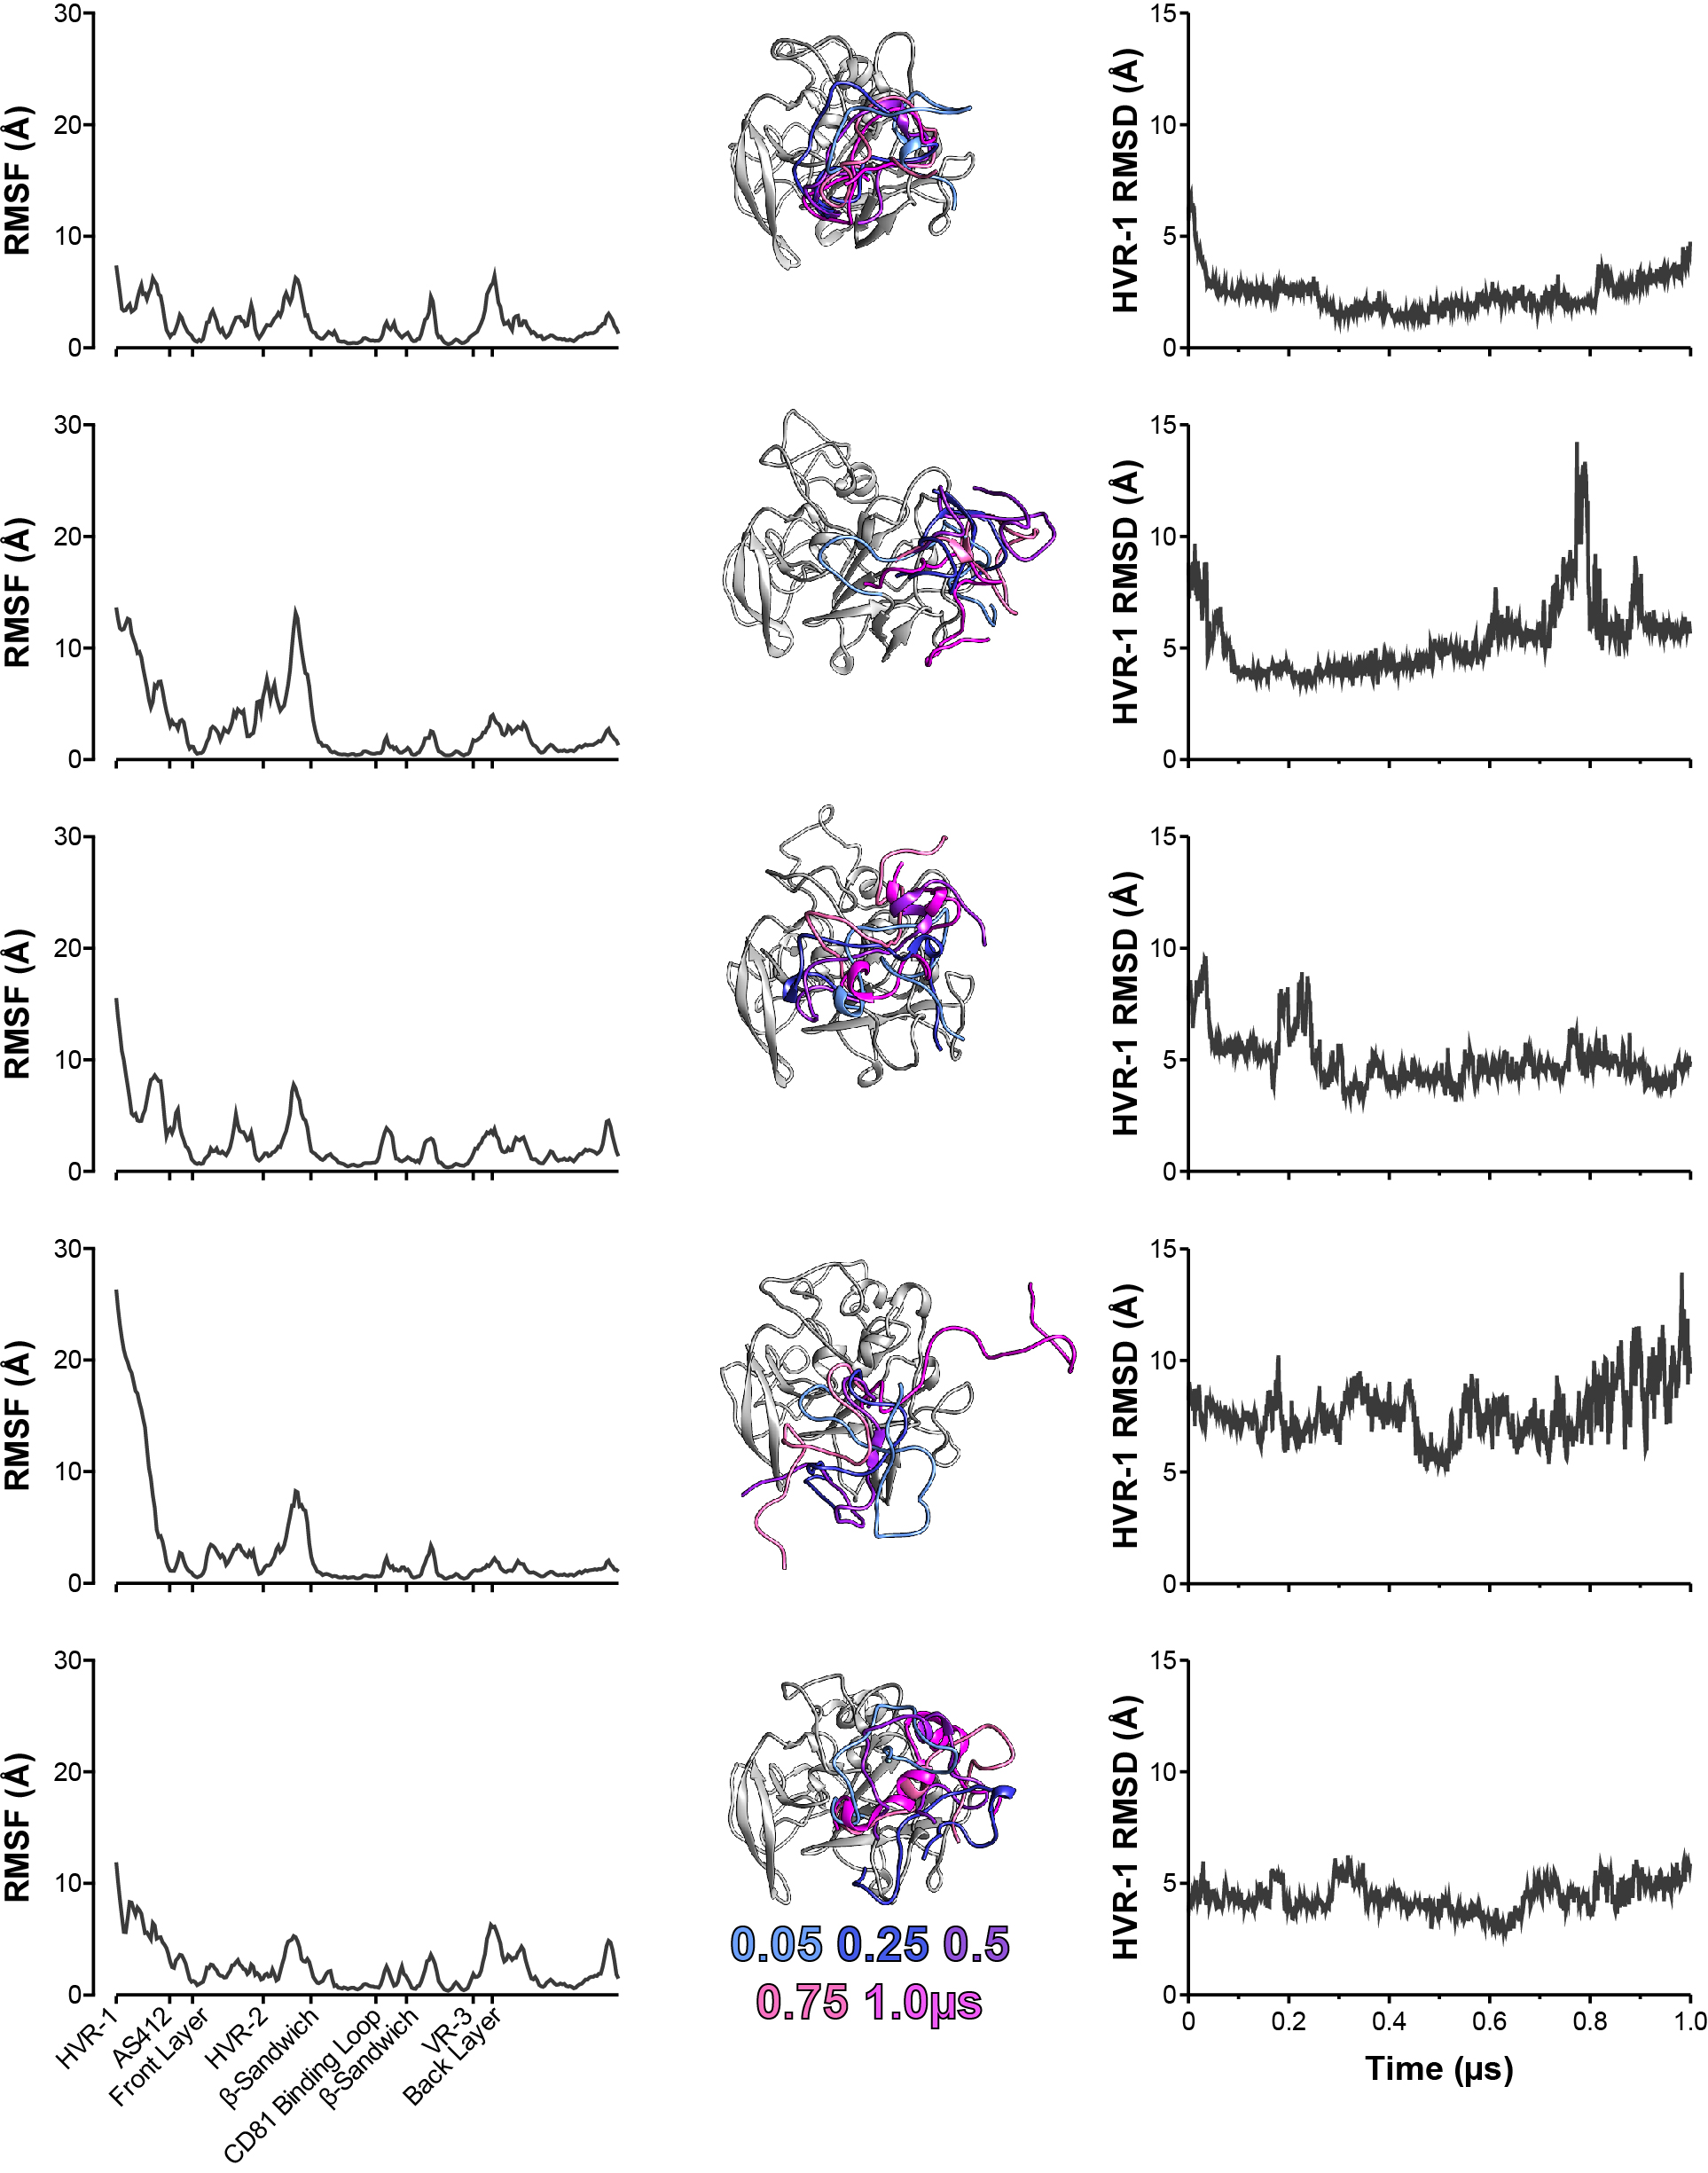

Supplement: supp [file elife-71854-supp-v1.zip › elife_poa_e71854_Figure_4_figure_supplement_2.jpg]

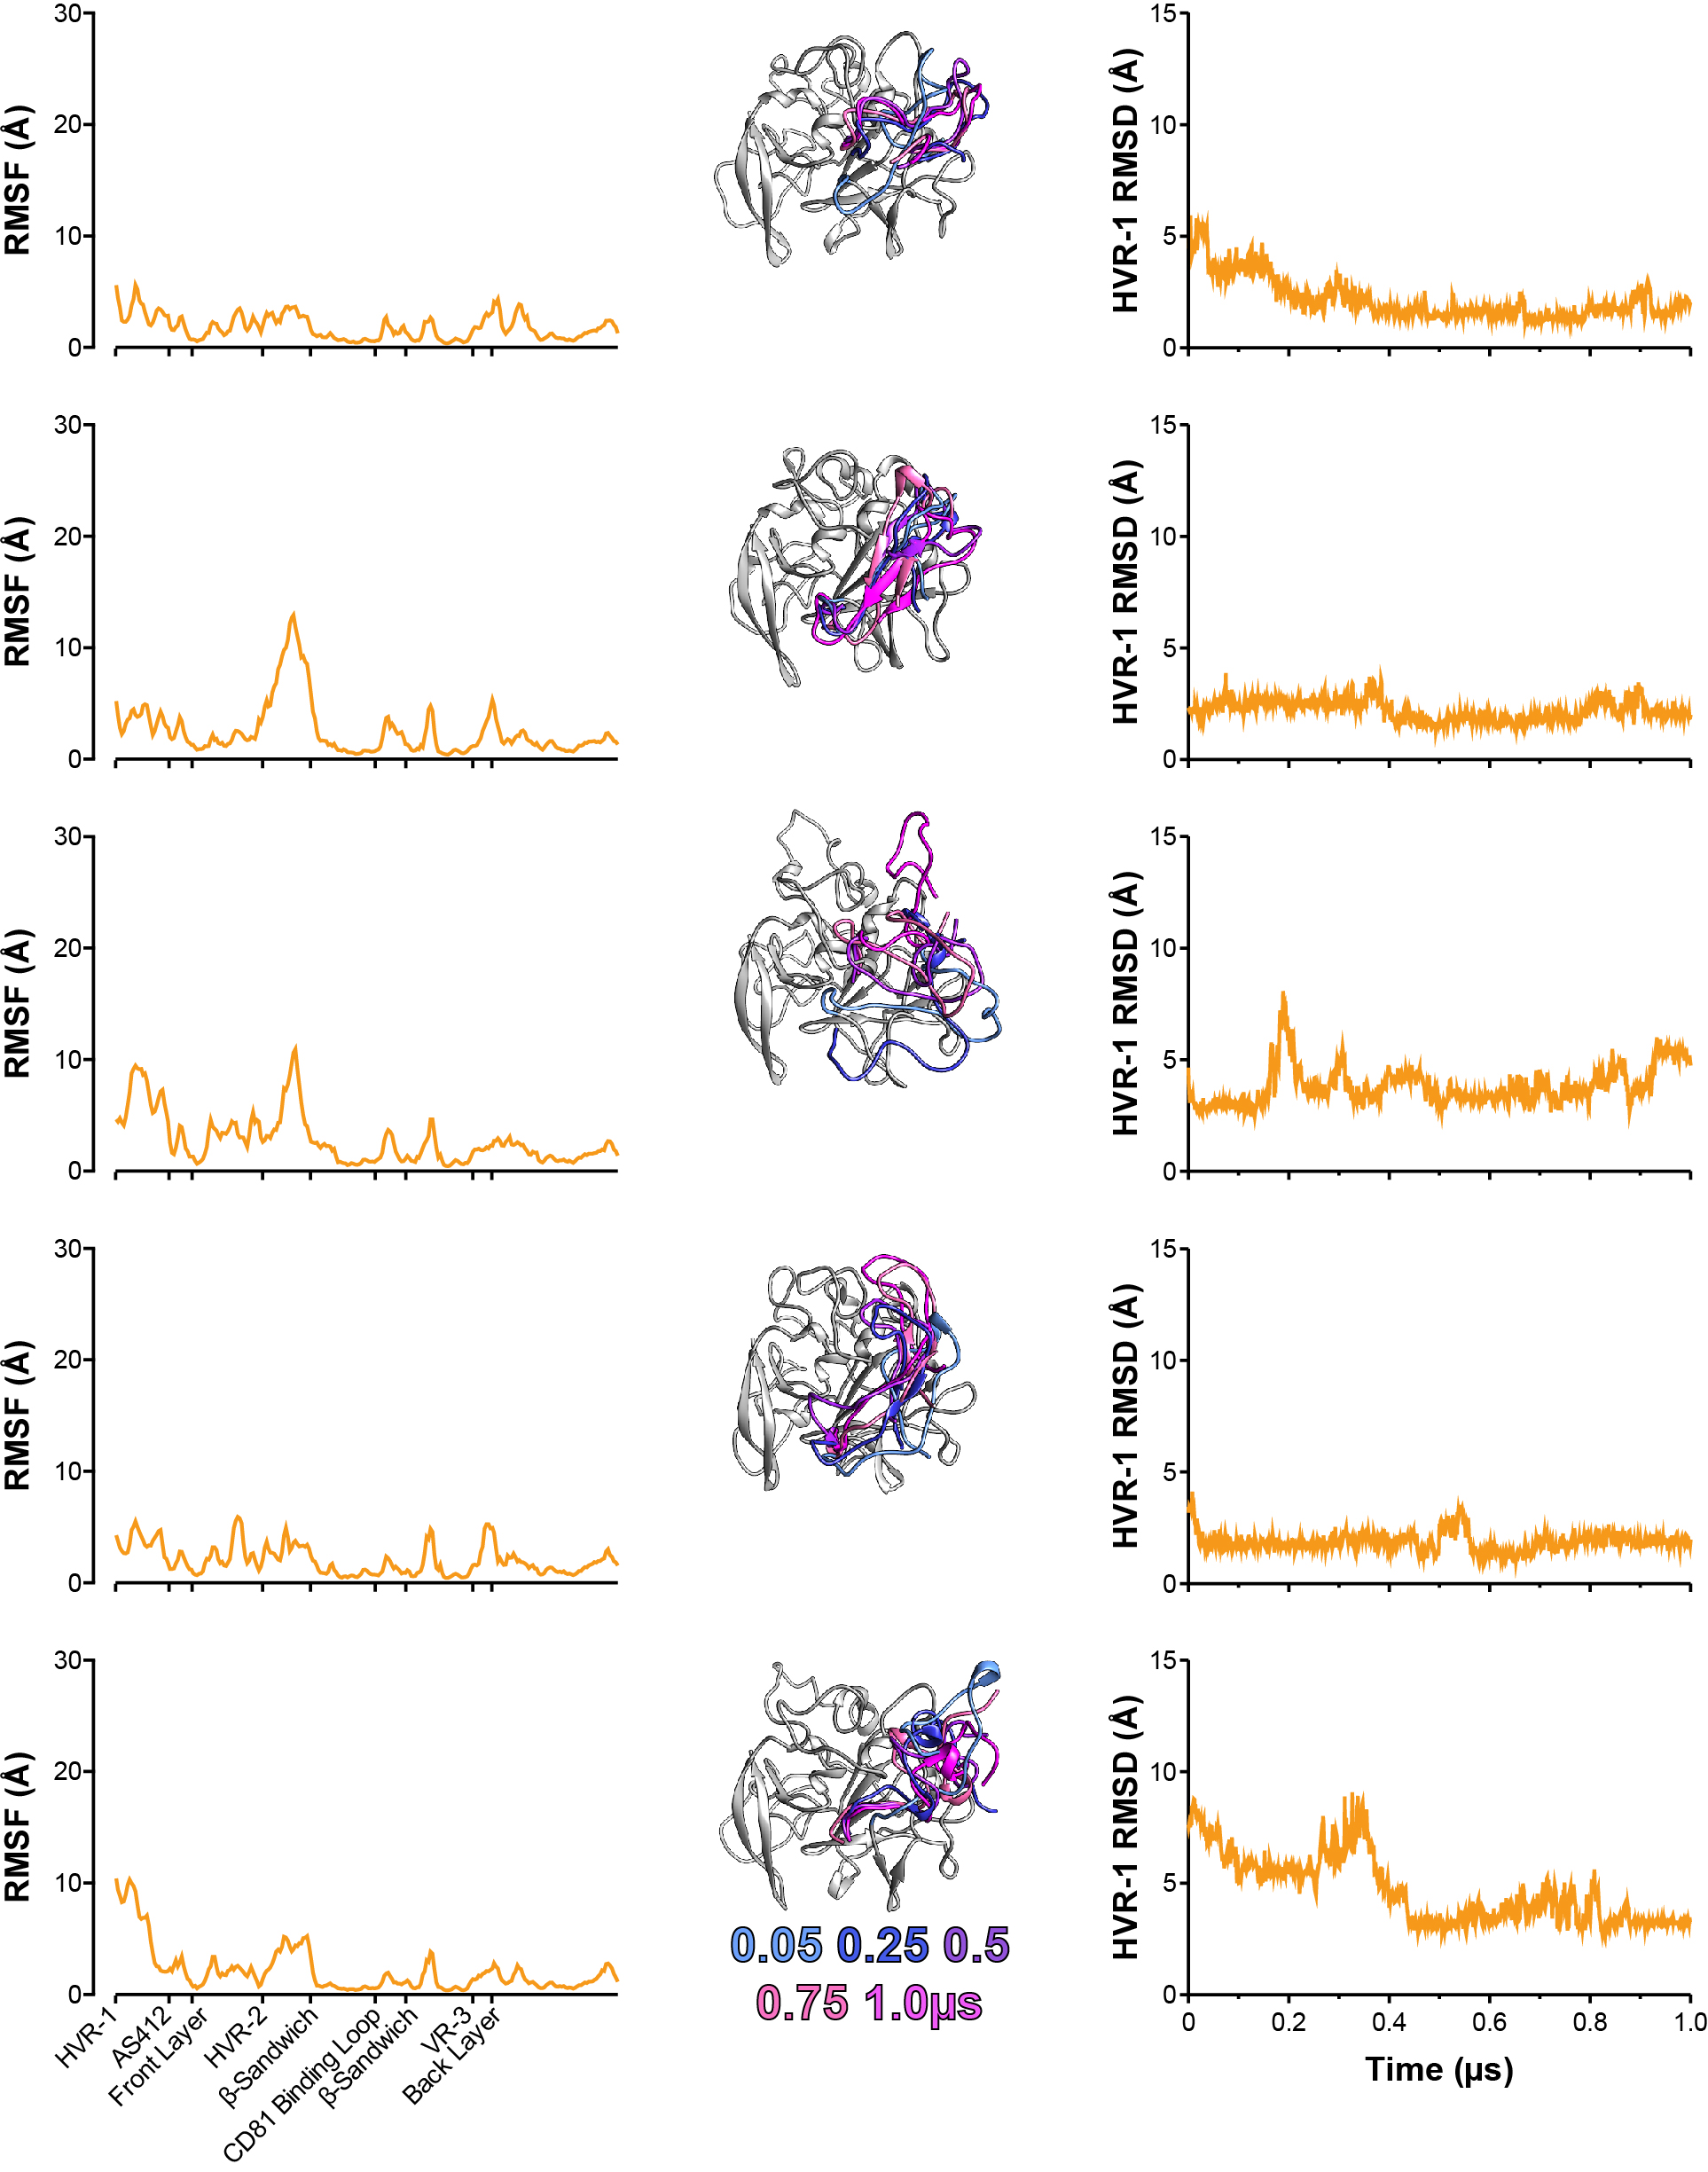

Supplement: supp [file elife-71854-supp-v1.zip › elife_poa_e71854_Figure_4_figure_supplement_3.jpg]

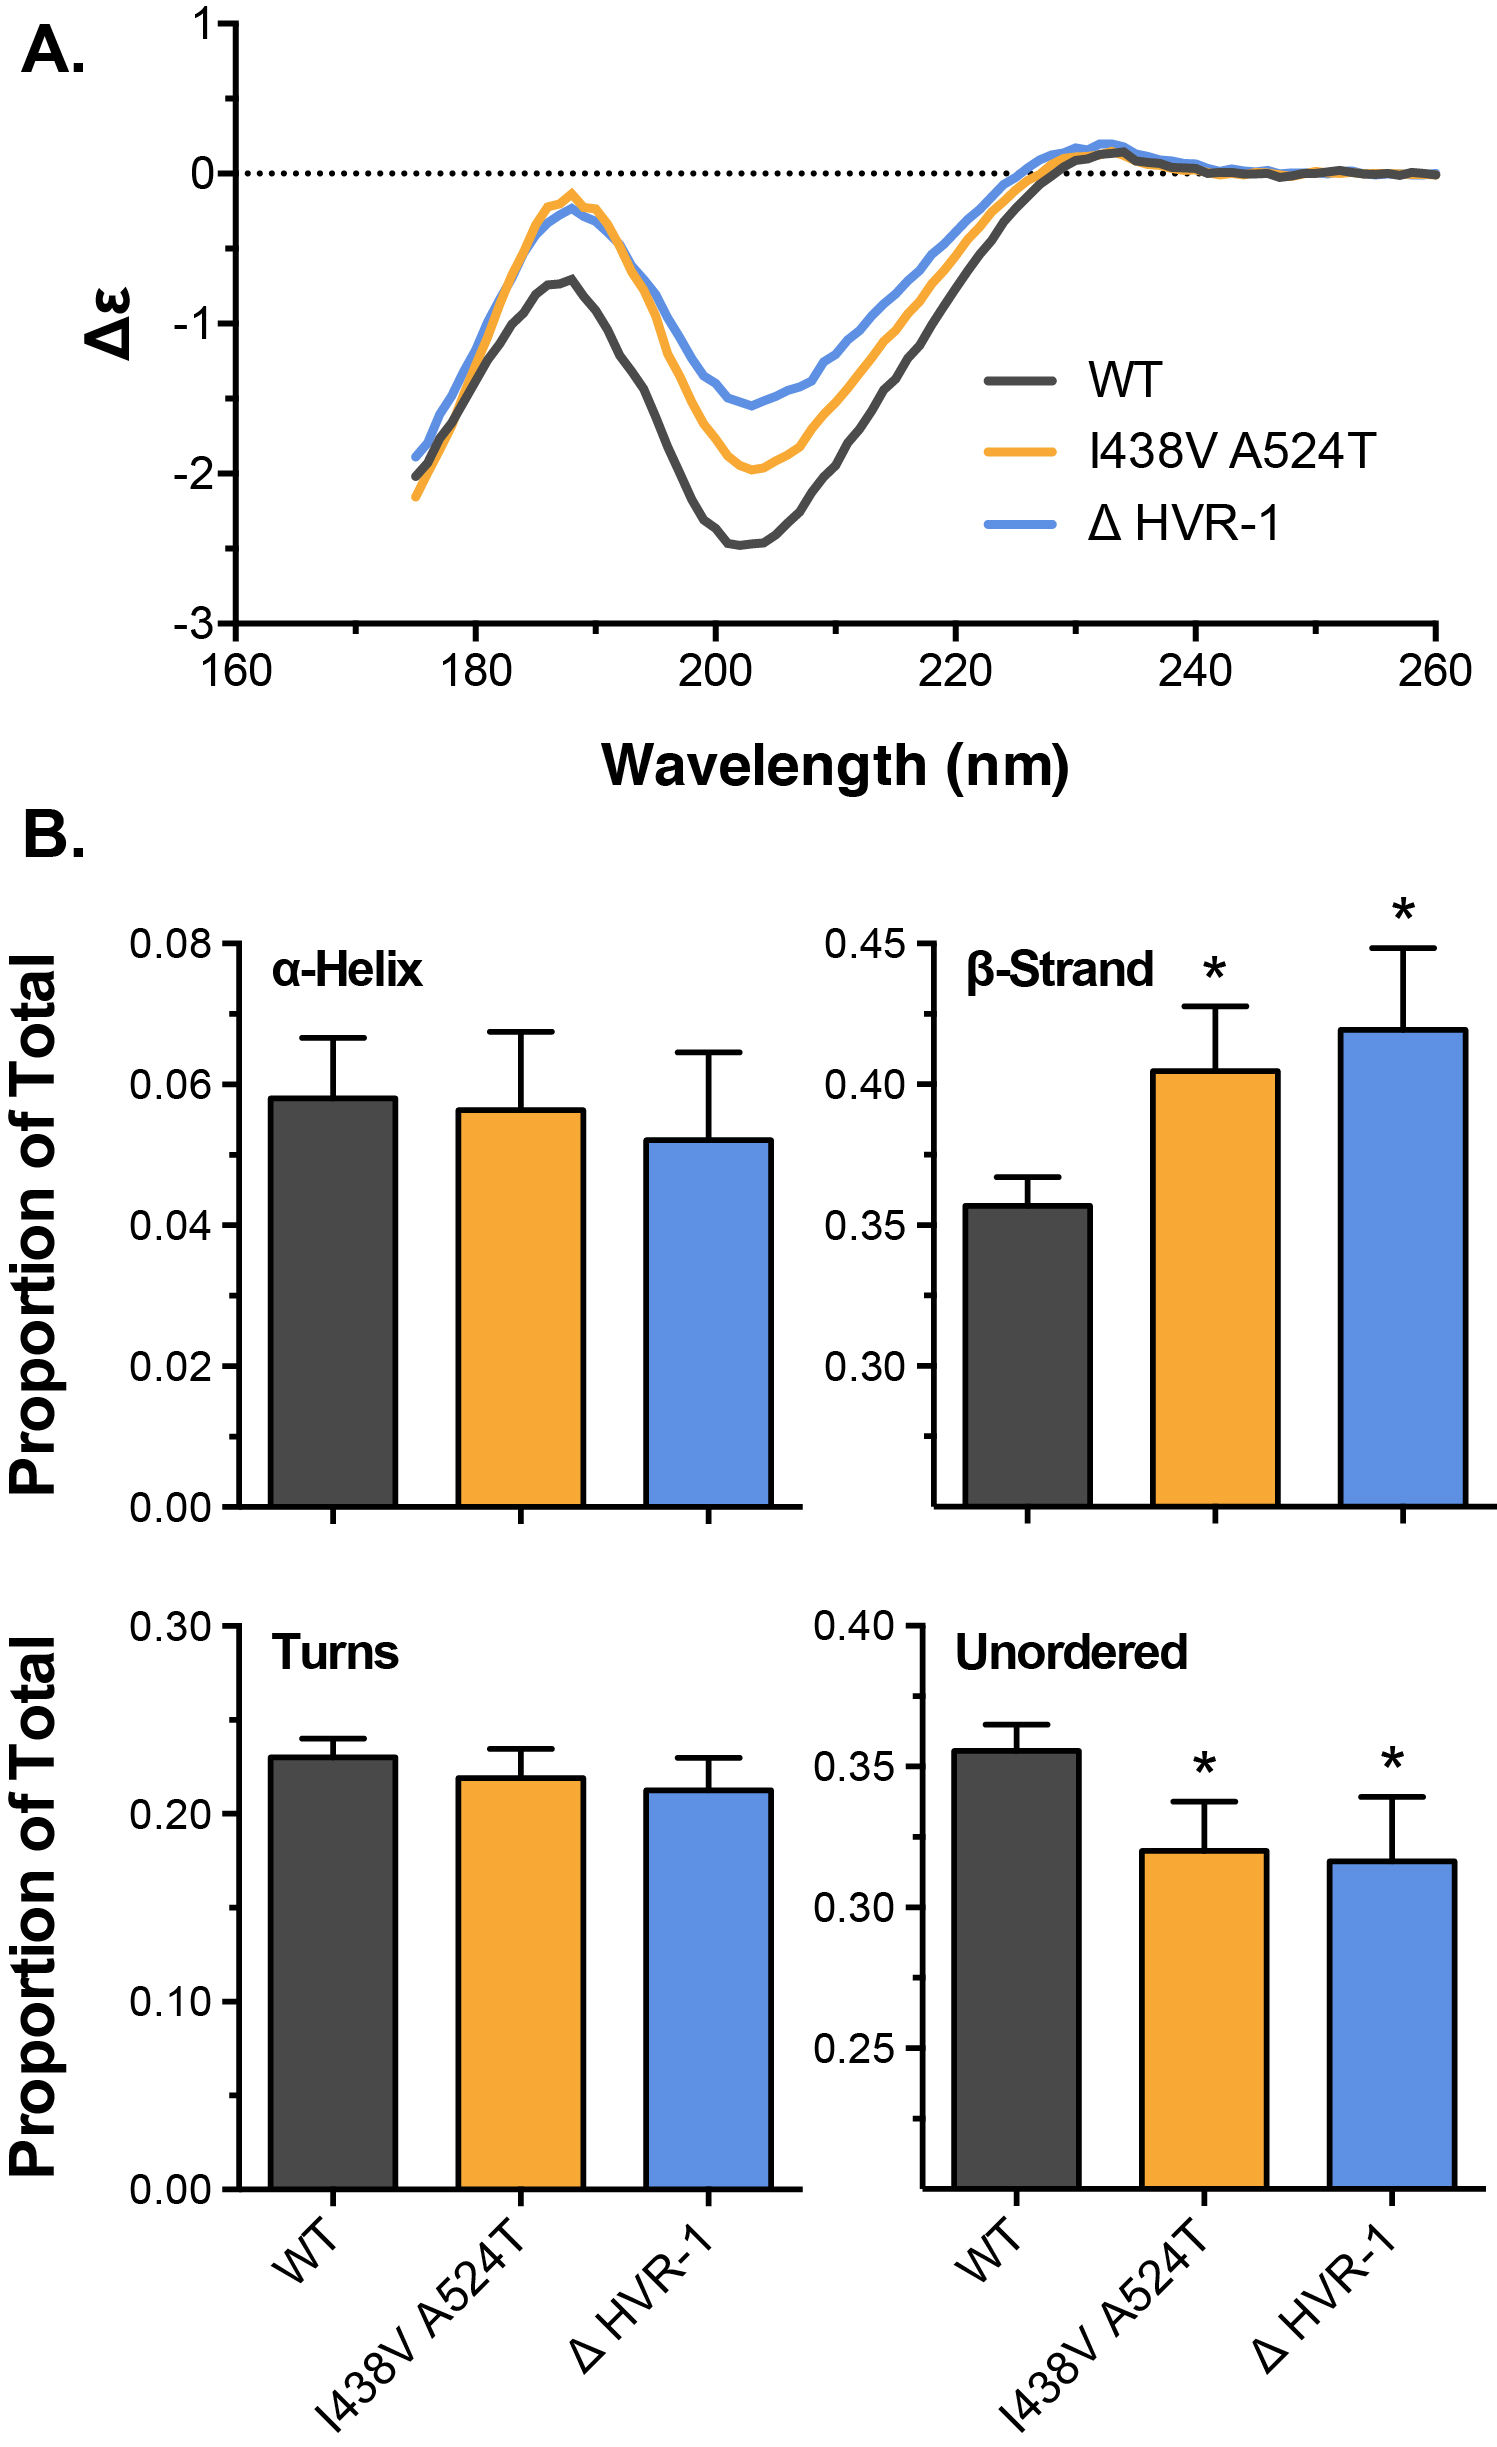

Supplement: supp [file elife-71854-supp-v1.zip › elife_poa_e71854_Figure_4_figure_supplement_4.jpg]

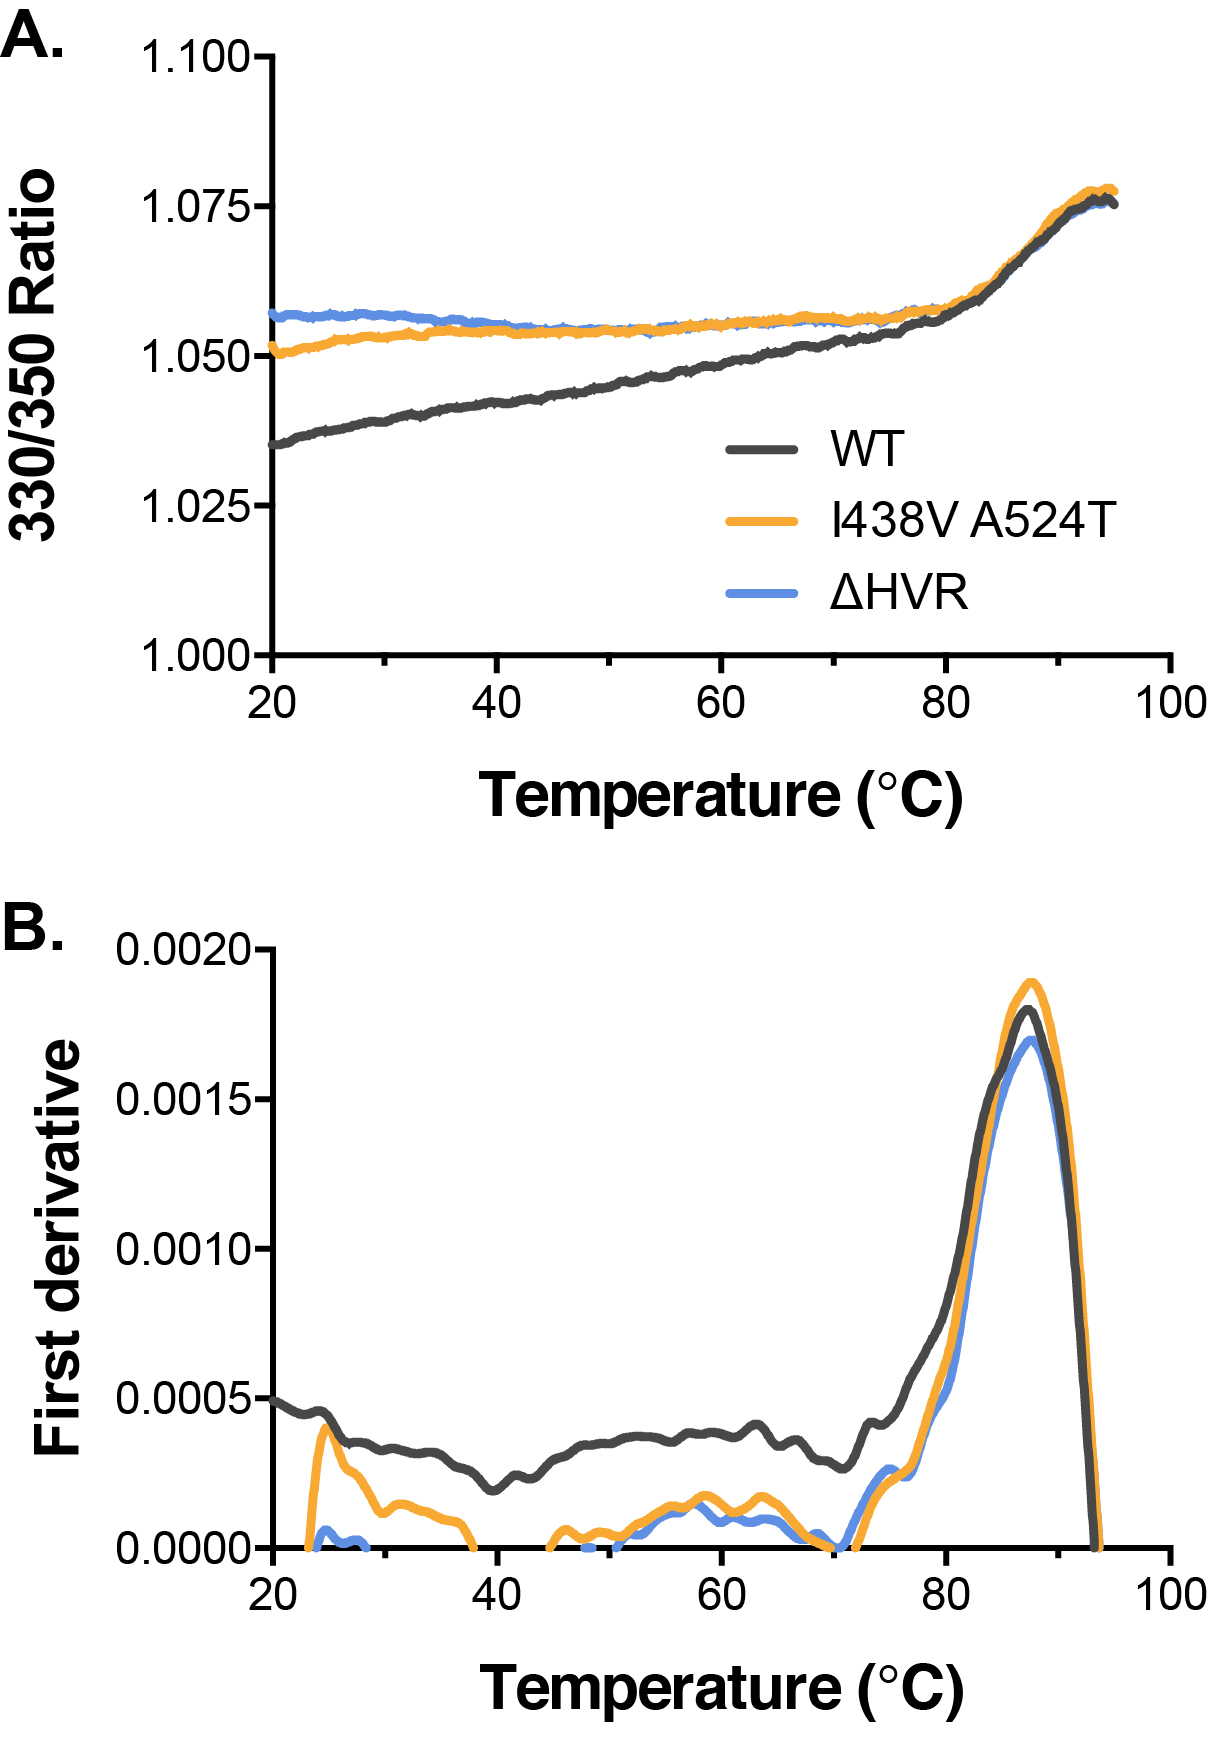

Supplement: supp [file elife-71854-supp-v1.zip › elife_poa_e71854_Figure_4_figure_supplement_5.jpg]

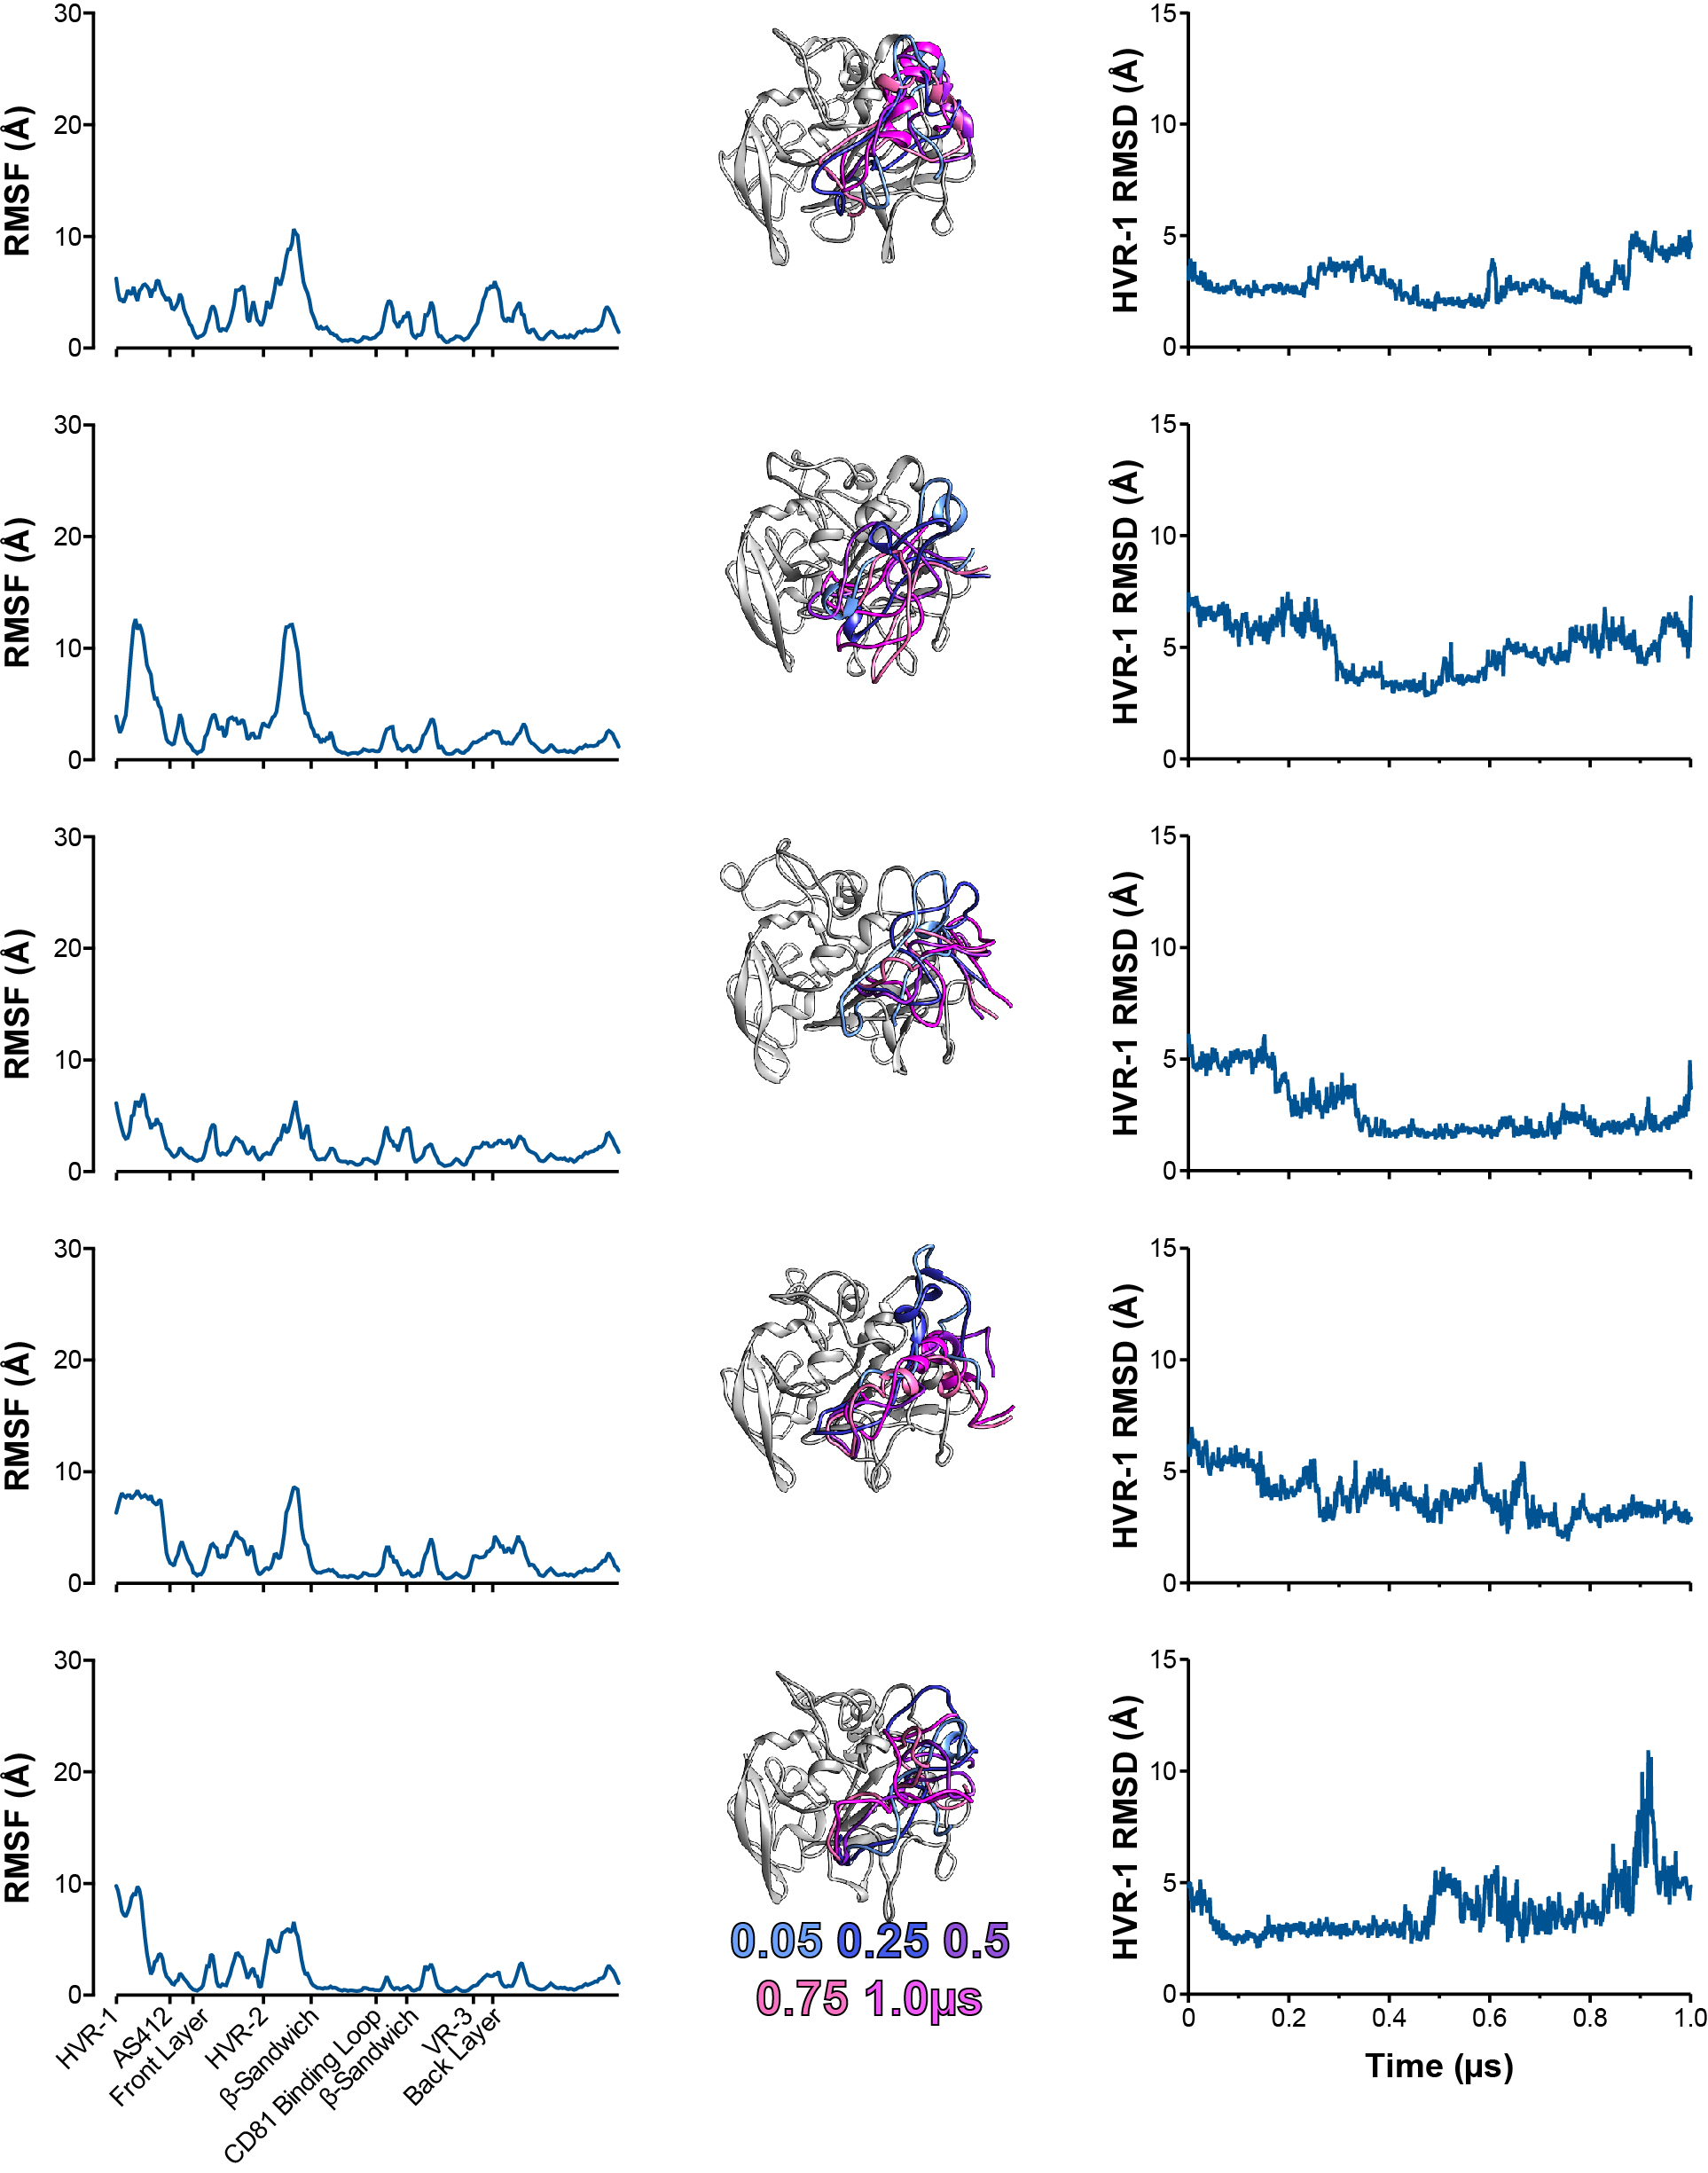

Supplement: supp [file elife-71854-supp-v1.zip › elife_poa_e71854_Figure_6_figure_supplement_1.jpg]
